# Supplementary material for: Bidirectional Causal Associations Between Inflammatory Bowel Disease and Ankylosing Spondylitis: A Two-Sample Mendelian Randomization Analysis
Source: PubMed Central journal article supplement (PMC7710797; doi:10.3389/fgene.2020.587876), 2020-11-19
Supplement: Data_Sheet_1.pdf [file Data_Sheet_1.pdf]

- Table S1.** Characteristics of the SNPs used in the Mendelian randomization analysis of the effects of ulcerative colitis on ankylosing spondylitis risk.
- Table S2.** Characteristics of the SNPs used in the Mendelian randomization analysis of the effects of Crohn’s disease on ankylosing spondylitis risk.
- Table S3.** Characteristics of the SNPs used in the Mendelian randomization analysis of the effects of inflammatory bowel disease on ankylosing spondylitis risk.
- Table S4.** Associations of the SNPs used in the Mendelian randomization analysis of ulcerative colitis and ankylosing spondylitis risk with potential confounding factors.
- Table S5.** Associations of the SNPs used in the Mendelian randomization analysis of Crohn’s disease and ankylosing spondylitis risk with potential confounding factors.
- Table S6.** Associations of the SNPs used in the Mendelian randomization analysis of inflammatory bowel disease and ankylosing spondylitis risk with potential confounding factors.
- Table S7.** Characteristics of the SNPs used in the Mendelian randomization analysis of the effects of ankylosing spondylitis on ulcerative colitis risk.
- Table S8.** Characteristics of the SNPs used in the Mendelian randomization analysis of the effects of ankylosing spondylitis on Crohn’s disease risk.
- Table S9.** Characteristics of the SNPs used in the Mendelian randomization analysis of the effects of ankylosing spondylitis on IBD risk.
- Table S10.** MR estimates from each method of assessing the causal effects of ankylosing spondylitis on ulcerative disease, Crohn’s disease and IBD risk.
- Table S11.** Heterogeneity and pleiotropy analysis of ankylosing spondylitis with ulcerative disease, Crohn’s disease, and IBD risk using different analytic methods.
- Figure S1.** “Leave-one-out” sensitivity analysis of causal effects of ulcerative colitis on ankylosing spondylitis.
- Figure S2.** “Leave-one-out” sensitivity analysis of causal effects of Crohn’s disease on ankylosing spondylitis.
- Figure S3.** “Leave-one-out” sensitivity analysis of causal effects of inflammatory bowel disease on ankylosing spondylitis.
- Figure S4.** “Leave-one-out” sensitivity analysis of causal effects of ankylosing spondylitis on ulcerative colitis.
- Figure S5.** “Leave-one-out” sensitivity analysis of causal effects of ankylosing spondylitis on Crohn’s disease.
- Figure S6.** “Leave-one-out” sensitivity analysis of causal effects of ankylosing spondylitis on inflammatory bowel disease.

| Target SNPs | Chr | Mapped genes               | Effect allele* | Other allele* | Association with ulcerative colitis† |        |                 |                     | Association with ankylosing spondylitis‡ |        |                 |
|-------------|-----|----------------------------|----------------|---------------|--------------------------------------|--------|-----------------|---------------------|------------------------------------------|--------|-----------------|
|             |     |                            |                |               | $\beta^{\#}$                         | SE     | <i>p</i> -Value | <i>F</i> -Statistic | $\beta$                                  | SE     | <i>p</i> -Value |
| rs10010325  | 4   | TET2; TET2-AS1             | A              | C             | -0.0830                              | 0.0124 | 2.18E-11        | 44.8062             | -0.0010                                  | 0.0043 | 0.8158          |
| rs10121077  | 9   | INSL6; JAK2                | A              | G             | 0.1151                               | 0.0135 | 1.99E-17        | 72.1569             | 0.0062                                   | 0.0045 | 0.1733          |
| rs10460566  | 2   | DNMT3A                     | A              | G             | -0.0818                              | 0.0145 | 1.60E-08        | 31.9319             | -0.0079                                  | 0.0047 | 0.0938          |
| rs1076137   | 22  | ASCC2                      | G              | A             | -0.0823                              | 0.0141 | 5.18E-09        | 34.1197             | -0.0068                                  | 0.0048 | 0.1602          |
| rs1077773   | 7   | KCCAT333                   | A              | G             | 0.0721                               | 0.0124 | 5.96E-09        | 33.8460             | 0.0037                                   | 0.0041 | 0.3696          |
| rs10784670  | 12  | LOC107984526               | G              | A             | -0.1169                              | 0.0127 | 4.59E-20        | 84.1495             | 0.0041                                   | 0.0042 | 0.3278          |
| rs10799838  | 1   | RNF186; TMC04              | C              | T             | -0.1289                              | 0.0144 | 2.87E-19        | 80.5280             | 0.0035                                   | 0.0048 | 0.4684          |
| rs11041476  | 11  | LSP1                       | A              | G             | 0.0735                               | 0.0133 | 2.92E-08        | 30.7615             | 0.0027                                   | 0.0044 | 0.5420          |
| rs11083840  | 19  | PTGIR                      | G              | T             | 0.0691                               | 0.0125 | 3.41E-08        | 30.4589             | -0.0059                                  | 0.0042 | 0.1547          |
| rs11229555  | 11  | CNTF; GLYAT                | T              | G             | -0.0823                              | 0.0145 | 1.21E-08        | 32.4632             | -0.0017                                  | 0.0047 | 0.7146          |
| rs11230563  | 11  | CD6; LOC105369326          | T              | C             | -0.0751                              | 0.0134 | 1.90E-08        | 31.5916             | -0.0035                                  | 0.0044 | 0.4252          |
| rs11301008  | 3   | TRPC6                      | C              | T             | 0.1271                               | 0.0207 | 9.02E-10        | 37.5267             | -0.0088                                  | 0.0070 | 0.2058          |
| rs11641184  | 16  | LITAF                      | A              | C             | 0.0780                               | 0.0125 | 4.24E-10        | 38.9988             | 0.0049                                   | 0.0041 | 0.2321          |
| rs1182188   | 7   | GNA12                      | C              | T             | -0.1076                              | 0.0138 | 5.03E-15        | 61.2486             | -0.0075                                  | 0.0046 | 0.0991          |
| rs1297256   | 21  | LOC101927745               | T              | C             | -0.1011                              | 0.0127 | 2.10E-15        | 62.9730             | 0.0061                                   | 0.0042 | 0.1492          |
| rs13136827  | 4   | KIAA1109                   | C              | T             | -0.1118                              | 0.0176 | 2.35E-10        | 40.1550             | -0.0058                                  | 0.0059 | 0.3258          |
| rs13255292  | 8   | PVT1                       | T              | C             | -0.0755                              | 0.0137 | 3.82E-08        | 30.2414             | -0.0038                                  | 0.0045 | 0.3968          |
| rs13430791  | 2   | THADA                      | A              | G             | 0.1059                               | 0.0187 | 1.39E-08        | 32.1950             | 0.0024                                   | 0.0068 | 0.7232          |
| rs1405108   | 2   | LOC105373831; LOC100419513 | A              | C             | -0.0820                              | 0.0132 | 5.86E-10        | 38.3683             | -0.0037                                  | 0.0044 | 0.3999          |
| rs16939788  | 18  | LINC01882                  | T              | C             | 0.0808                               | 0.0146 | 3.46E-08        | 30.4288             | 0.0074                                   | 0.0046 | 0.1126          |
| rs17552904  | 7   | IKZF1; SPATA48             | T              | G             | 0.0830                               | 0.0141 | 4.25E-09        | 34.5043             | -0.0009                                  | 0.0047 | 0.8473          |
| rs17679361  | 17  | WIPF2                      | C              | T             | 0.2472                               | 0.0401 | 6.80E-10        | 38.0770             | 0.0126                                   | 0.0146 | 0.3859          |
| rs17694108  | 19  | SLC7A10; CEBPA-DT          | A              | G             | 0.0958                               | 0.0139 | 6.17E-12        | 47.2751             | 0.0081                                   | 0.0045 | 0.0724          |
| rs17780256  | 17  | SLC39A11; LOC105371887     | C              | A             | -0.1154                              | 0.0160 | 6.13E-13        | 51.8054             | -0.0073                                  | 0.0053 | 0.1650          |
| rs1886731   | 1   | HES5; TNFRSF14             | C              | T             | -0.1405                              | 0.0221 | 2.25E-10        | 40.4180             | -0.0101                                  | 0.0041 | 0.0134          |
| rs2070729   | 5   | IRF1                       | A              | C             | -0.0828                              | 0.0126 | 4.59E-11        | 43.3453             | -0.0071                                  | 0.0042 | 0.0903          |
| rs2274351   | 10  | SUFU; ACTR1A               | T              | C             | 0.0711                               | 0.0130 | 4.90E-08        | 29.7576             | 0.0061                                   | 0.0042 | 0.1418          |
| rs2301989   | 7   | SLC26A3                    | A              | G             | -0.1410                              | 0.0217 | 8.55E-11        | 42.2195             | -0.0029                                  | 0.0041 | 0.4791          |
| rs2395022   | 7   | KPNA7                      | C              | A             | -0.1839                              | 0.0292 | 2.88E-10        | 39.7549             | 0.0086                                   | 0.0106 | 0.4173          |
| rs2488401   | 1   | DENND1B                    | T              | C             | 0.0932                               | 0.0153 | 1.12E-09        | 37.1082             | -0.0030                                  | 0.0050 | 0.5512          |
| rs272882    | 5   | MIR3936HG; SLC22A4         | T              | G             | 0.1459                               | 0.0139 | 6.67E-26        | 110.7637            | 0.0021                                   | 0.0045 | 0.6370          |
| rs2816958   | 1   | NR5A2                      | G              | A             | 0.1808                               | 0.0205 | 1.14E-18        | 77.8060             | -0.0034                                  | 0.0068 | 0.6188          |
| rs28624     | 1   | ERRFI1                     | C              | A             | -0.1373                              | 0.0174 | 2.76E-15        | 62.4315             | -0.0032                                  | 0.0056 | 0.5677          |
| rs34659678  | 6   | TRAF3IP2; TRAF3IP2-AS1     | T              | C             | 0.2099                               | 0.0251 | 5.95E-17        | 69.9926             | 0.0077                                   | 0.0094 | 0.4122          |
| rs4366152   | 9   | TNFSF15                    | C              | T             | 0.1204                               | 0.0136 | 7.79E-19        | 78.5515             | 0.0013                                   | 0.0042 | 0.7550          |
| rs4728142   | 7   | IRF5; LOC392787            | A              | G             | 0.0970                               | 0.0127 | 1.92E-14        | 58.6144             | 0.0059                                   | 0.0042 | 0.1597          |
| rs4743820   | 9   | LINC00484; LOC100507103    | T              | C             | 0.0809                               | 0.0138 | 4.05E-09        | 34.6004             | 0.0040                                   | 0.0044 | 0.3636          |
| rs483905    | 11  | MAML2                      | A              | G             | 0.1289                               | 0.0228 | 1.57E-08        | 31.9636             | 0.0030                                   | 0.0045 | 0.5057          |
| rs4946717   | 6   | PRDM1; RN7SKP211           | T              | C             | -0.0751                              | 0.0126 | 2.35E-09        | 35.6582             | 0.0039                                   | 0.0042 | 0.3544          |
| rs4973341   | 2   | SNRPGP8; LOC100533842      | T              | C             | 0.0735                               | 0.0131 | 2.25E-08        | 31.2631             | 0.0009                                   | 0.0045 | 0.8420          |
| rs59418206  | 10  | CUL2                       | A              | G             | 0.0736                               | 0.0130 | 1.45E-08        | 32.1192             | 0.0003                                   | 0.0039 | 0.9383          |

|            |    |                         |   |   |         |        |          |         |         |        |        |
|------------|----|-------------------------|---|---|---------|--------|----------|---------|---------|--------|--------|
| rs596217   | 11 | NXPE2                   | A | G | -0.092  | 0.0127 | 2.39E-13 | 53.6563 | -0.0058 | 0.0041 | 0.1560 |
| rs6933404  | 6  | BTF3L4P3; LOC102723649  | C | T | 0.1668  | 0.0252 | 3.68E-11 | 43.8113 | -0.0010 | 0.0052 | 0.8483 |
| rs7240004  | 18 | CTIF; LOC105372105      | G | A | -0.0824 | 0.0130 | 2.50E-10 | 40.0326 | -0.0059 | 0.0042 | 0.1605 |
| rs7404095  | 16 | PRKCB                   | C | T | 0.0718  | 0.0127 | 1.52E-08 | 32.0223 | 0.0068  | 0.0042 | 0.1003 |
| rs76546301 | 7  | RNU6-1091P; FIGNL1      | A | G | 0.2650  | 0.0410 | 1.05E-10 | 41.7277 | -0.0190 | 0.0185 | 0.3042 |
| rs7752873  | 6  | PRDM1; ATG5             | T | C | 0.1823  | 0.0303 | 1.83E-09 | 36.1971 | 0.0098  | 0.0063 | 0.1235 |
| rs79045992 | 16 | RPL35AP33; LOC105371321 | A | G | 0.1181  | 0.0208 | 1.43E-08 | 32.1418 | 0.0032  | 0.0068 | 0.6380 |
| rs941823   | 13 | LINC00598               | C | T | 0.1087  | 0.0147 | 1.39E-13 | 54.7183 | -0.0021 | 0.0047 | 0.6554 |
| rs9891119  | 17 | STAT3                   | C | A | -0.0895 | 0.0133 | 1.72E-11 | 45.2626 | -0.0032 | 0.0042 | 0.4503 |
| rs9911533  | 17 | CCR7; SMARCE1           | T | C | 0.0766  | 0.0132 | 7.34E-09 | 33.4439 | 0.0024  | 0.0042 | 0.5666 |
| rs9941524  | 2  | LOC105373831            | G | A | 0.0977  | 0.0128 | 2.15E-14 | 58.3869 | 0.0033  | 0.0041 | 0.4234 |

SNP = single nucleotide polymorphism; Chr = chromosome;  $\beta$  = regression effect size; SE= standard error (the standard error is an estimate of the standard deviation (SD) of the coefficient)

\*Allele associated with higher higher risk of ulcerative colitis in European descent.

<sup>†</sup> Effect size estimates for ulcerative colitis were from International Inflammatory Bowel Disease Genetics Consortium (IIBDGC).

<sup>‡</sup> Effect size estimates for ankylosing spondylitis were from International Genetics of Ankylosing Spondylitis Consortium (IGAS).

<sup>#</sup> Increase in log-odds risk of ulcerative colitis per additional exposure-increasing allele.

**Table S1.** Characteristics of the SNPs used in the Mendelian randomization analysis of the effects of ulcerative colitis on ankylosing spondylitis risk

| Target SNPs | Chr | Mapped genes               | Effect allele* | Other allele | Association with Crohn's disease† |        |                 |                     | Association with ankylosing spondylitis‡ |        |                 |
|-------------|-----|----------------------------|----------------|--------------|-----------------------------------|--------|-----------------|---------------------|------------------------------------------|--------|-----------------|
|             |     |                            |                |              | $\beta^{\#}$                      | SE     | <i>p</i> -Value | <i>F</i> -Statistic | $\beta$                                  | SE     | <i>p</i> -Value |
| rs102275    | 11  | TMEM258                    | C              | T            | 0.0903                            | 0.0124 | 3.98E-13        | 52.6546             | 0.0021                                   | 0.0043 | 0.6237          |
| rs10276381  | 7   | JAZF1                      | T              | C            | 0.1159                            | 0.0188 | 6.75E-10        | 38.0913             | 0.0036                                   | 0.0061 | 0.5528          |
| rs11117431  | 16  | LOC105371388; LOC105371389 | G              | A            | -0.1493                           | 0.0164 | 1.09E-19        | 82.4366             | -0.0082                                  | 0.0053 | 0.1229          |
| rs11648136  | 16  | BRD7; LINC02178            | T              | C            | -0.1266                           | 0.0186 | 1.06E-11        | 46.2090             | -0.0004                                  | 0.0052 | 0.9386          |
| rs11691685  | 2   | TEX41                      | G              | A            | -0.1577                           | 0.0233 | 1.35E-11        | 45.7379             | -0.0064                                  | 0.0084 | 0.4449          |
| rs12041056  | 1   | IL23R                      | T              | C            | 0.1084                            | 0.0121 | 3.51E-19        | 80.1256             | 0.0058                                   | 0.0042 | 0.1637          |
| rs12949918  | 17  | STAT3                      | C              | T            | -0.1042                           | 0.0124 | 3.47E-17        | 71.0556             | -0.0070                                  | 0.0042 | 0.0976          |
| rs1297258   | 21  | LOC101927745               | T              | C            | -0.1272                           | 0.0122 | 2.11E-25        | 108.4841            | 0.0064                                   | 0.0042 | 0.1292          |
| rs13204048  | 6   | SLC22A23                   | C              | T            | -0.0685                           | 0.0123 | 2.89E-08        | 30.7791             | -0.0065                                  | 0.0042 | 0.1182          |
| rs16870166  | 5   | LOC105374737               | A              | G            | 0.1488                            | 0.0262 | 1.36E-08        | 32.2394             | 0.0036                                   | 0.0091 | 0.6924          |
| rs16917597  | 10  | ZNF365                     | A              | G            | -0.2622                           | 0.0460 | 1.21E-08        | 32.4772             | 0.0015                                   | 0.0152 | 0.9216          |
| rs17293632  | 15  | SMAD3                      | T              | C            | 0.1284                            | 0.0140 | 3.70E-20        | 84.5743             | -0.0024                                  | 0.0050 | 0.6321          |
| rs17391694  | 1   | LOC107984997; RNFT1P2      | T              | C            | -0.1191                           | 0.0200 | 2.62E-09        | 35.4492             | -0.0091                                  | 0.0064 | 0.1531          |
| rs17694108  | 19  | SLC7A10; CEBPA-DT          | A              | G            | 0.0796                            | 0.0135 | 3.29E-09        | 35.0041             | 0.0081                                   | 0.0045 | 0.0724          |
| rs181826    | 5   | NDFIP1                     | A              | C            | 0.0996                            | 0.0127 | 4.53E-15        | 61.4532             | 0.0057                                   | 0.0043 | 0.1850          |
| rs1872691   | 16  | ADCY7; BRD7                | A              | G            | -0.1325                           | 0.0158 | 4.43E-17        | 70.5743             | -0.0095                                  | 0.0052 | 0.0652          |
| rs1990623   | 16  | NKD1; LINC02178            | G              | A            | 0.2037                            | 0.0158 | 4.52E-38        | 166.4030            | -0.0041                                  | 0.0061 | 0.5020          |
| rs2143606   | 20  | OSER1; OSER1-DT            | G              | A            | -0.0742                           | 0.0121 | 8.36E-10        | 37.6733             | 0.0004                                   | 0.0045 | 0.9295          |
| rs2153283   | 10  | IPMK                       | A              | C            | -0.1088                           | 0.0155 | 2.39E-12        | 49.1310             | -0.0026                                  | 0.0048 | 0.5863          |
| rs224140    | 10  | ALDH7A1P4; LOC105378327    | T              | C            | -0.1325                           | 0.0237 | 2.20E-08        | 31.3136             | -0.0136                                  | 0.0075 | 0.0703          |
| rs2284553   | 21  | IFNGR2                     | G              | A            | 0.1032                            | 0.0123 | 5.63E-17        | 70.1034             | -0.0036                                  | 0.0041 | 0.3864          |
| rs2395022   | 7   | KPNA7                      | C              | A            | -0.1772                           | 0.0282 | 3.13E-10        | 39.5888             | 0.0086                                   | 0.0106 | 0.4173          |
| rs2488401   | 1   | DENND1B                    | T              | C            | 0.1205                            | 0.0147 | 2.07E-16        | 67.5305             | -0.0030                                  | 0.0050 | 0.5512          |
| rs2538470   | 7   | RPL32P17; LOC392145        | G              | A            | -0.0750                           | 0.0123 | 1.05E-09        | 37.2371             | -0.0047                                  | 0.0044 | 0.2823          |
| rs2945412   | 17  | KSR1                       | A              | G            | 0.1130                            | 0.0123 | 4.51E-20        | 84.1845             | -0.0046                                  | 0.0042 | 0.2761          |
| rs303429    | 10  | MAP3K8; CCND3P1            | T              | C            | 0.0763                            | 0.0124 | 8.38E-10        | 37.6707             | 0.0005                                   | 0.0045 | 0.9110          |
| rs34592089  | 4   | BANK1                      | A              | G            | 0.1994                            | 0.0250 | 1.41E-15        | 63.7524             | 0.0063                                   | 0.0088 | 0.4747          |
| rs34779708  | 10  | CREM                       | G              | T            | 0.1345                            | 0.0124 | 1.90E-27        | 117.8204            | 0.0005                                   | 0.0040 | 0.9007          |
| rs34804116  | 5   | LOC105379031; LOC340090    | A              | C            | -0.0939                           | 0.0127 | 1.27E-13        | 54.8958             | -0.0033                                  | 0.0043 | 0.4383          |
| rs3812609   | 9   | NOTCH1                     | T              | C            | -0.0938                           | 0.0169 | 2.95E-08        | 30.7373             | -0.0027                                  | 0.0057 | 0.6356          |
| rs3853824   | 17  | C17orf67                   | C              | T            | 0.0814                            | 0.0126 | 1.17E-10        | 41.5093             | 0.0045                                   | 0.0044 | 0.3052          |
| rs41295117  | 10  | RPL32P23; RBM17            | C              | T            | -0.1129                           | 0.0174 | 8.90E-11        | 42.0502             | -0.0056                                  | 0.0056 | 0.3171          |
| rs4767956   | 12  | SLC2A13                    | G              | A            | -0.0770                           | 0.0123 | 4.29E-10        | 38.9782             | 0.0035                                   | 0.0044 | 0.4242          |
| rs559928    | 11  | RPS6KA4; LINC02723         | C              | T            | 0.0991                            | 0.0158 | 3.75E-10        | 39.2411             | 0.0062                                   | 0.0053 | 0.2374          |
| rs56163845  | 5   | CPEB4                      | G              | A            | -0.0919                           | 0.0135 | 9.40E-12        | 46.4500             | -0.0048                                  | 0.0047 | 0.3047          |
| rs568617    | 11  | FIBP                       | T              | C            | 0.0851                            | 0.0151 | 1.75E-08        | 31.7550             | 0.0075                                   | 0.0050 | 0.1348          |
| rs6074022   | 20  | RPL13P2; CD40              | T              | C            | -0.0963                           | 0.0138 | 2.70E-12        | 48.8979             | -0.0035                                  | 0.0047 | 0.4544          |
| rs61959448  | 13  | AKAP11; FABP3P2            | A              | G            | 0.1073                            | 0.0167 | 1.50E-10        | 41.0287             | 0.0068                                   | 0.0058 | 0.2423          |
| rs6561151   | 13  | LOC107984576               | A              | G            | 0.1471                            | 0.0142 | 4.68E-25        | 106.9028            | 0.0070                                   | 0.0049 | 0.1572          |
| rs6679677   | 1   | PHTF1                      | A              | C            | -0.1852                           | 0.0221 | 4.67E-17        | 70.4724             | -0.0091                                  | 0.0076 | 0.2263          |
| rs6738490   | 2   | ATG16L1                    | C              | T            | 0.2262                            | 0.0121 | 4.26E-78        | 349.9869            | 0.0074                                   | 0.0042 | 0.0737          |

|            |    |                                   |   |   |         |        |          |          |         |        |        |
|------------|----|-----------------------------------|---|---|---------|--------|----------|----------|---------|--------|--------|
| rs6738825  | 2  | PLCL1                             | G | A | -0.0748 | 0.0119 | 2.86E-10 | 39.7655  | 0.0002  | 0.0036 | 0.9559 |
| rs6740462  | 2  | LOC105374780                      | A | C | 0.0997  | 0.0141 | 1.74E-12 | 49.7615  | 0.0078  | 0.0047 | 0.0985 |
| rs6827756  | 4  | KIAA1109                          | C | T | -0.0790 | 0.0126 | 3.27E-10 | 39.5065  | -0.0061 | 0.0042 | 0.1515 |
| rs7097656  | 10 | TSPAN14                           | C | T | 0.1321  | 0.0152 | 3.89E-18 | 75.3778  | 0.0008  | 0.0056 | 0.8868 |
| rs714027   | 22 | HORMAD2                           | G | A | -0.0895 | 0.0123 | 3.51E-13 | 52.8998  | -0.0028 | 0.0042 | 0.5041 |
| rs7194886  | 16 | NOD2; SNX20                       | T | C | -0.2270 | 0.0122 | 1.42E-77 | 347.5901 | -0.0002 | 0.0038 | 0.9576 |
| rs7195296  | 16 | SNN; LITAF                        | C | A | -0.0921 | 0.0138 | 2.56E-11 | 44.4863  | 0.0071  | 0.0047 | 0.1298 |
| rs72727394 | 15 | RASGRP1                           | T | C | 0.1032  | 0.0150 | 5.28E-12 | 47.5795  | 0.0024  | 0.0052 | 0.6473 |
| rs7438704  | 4  | SLAIN2                            | G | A | 0.0839  | 0.0127 | 3.42E-11 | 43.9207  | 0.0044  | 0.0042 | 0.2961 |
| rs752508   | 19 | SBNO2; LOC102725180; LOC102723798 | A | G | 0.1066  | 0.0137 | 7.95E-15 | 60.3475  | -0.0065 | 0.0044 | 0.1410 |
| rs76606004 | 9  | LOC645266; TNFSF8                 | T | C | 0.3027  | 0.0520 | 5.79E-09 | 33.9038  | 0.0002  | 0.0153 | 0.9896 |
| rs7758080  | 6  | TAB2; TAB2-AS1                    | G | A | 0.0761  | 0.0132 | 7.27E-09 | 33.4601  | -0.0004 | 0.0051 | 0.9371 |
| rs77981966 | 2  | THADA                             | T | C | 0.1827  | 0.0222 | 2.19E-16 | 67.4216  | 0.0063  | 0.0084 | 0.4533 |
| rs7848647  | 9  | TNFSF15                           | C | T | 0.1413  | 0.0130 | 1.55E-27 | 118.2245 | 0.0007  | 0.0042 | 0.8661 |
| rs925255   | 2  | FLJ31356; FOSL2                   | T | C | -0.1000 | 0.0121 | 1.07E-16 | 68.8317  | -0.0035 | 0.0042 | 0.4074 |
| rs9457247  | 6  | LOC105378120; MIR3939             | T | C | 0.1237  | 0.0124 | 2.08E-23 | 99.3850  | 0.0008  | 0.0044 | 0.8556 |
| rs9554587  | 13 | CCR12P; UBAC2                     | G | A | -0.0952 | 0.0147 | 8.29E-11 | 42.1882  | -0.0001 | 0.0046 | 0.9827 |
| rs974801   | 4  | TET2                              | G | A | -0.0700 | 0.0123 | 1.27E-08 | 32.3789  | -0.0005 | 0.0043 | 0.9074 |

SNP = single nucleotide polymorphism; Chr = chromosome;  $\beta$  = regression effect size; SE = standard error (the standard error is an estimate of the standard deviation (SD) of the coefficient)

\*Allele associated with higher risk of Crohn's disease in European descent.

† Effect size estimates for Crohn's disease were from International Inflammatory Bowel Disease Genetics Consortium (IIBDGC).

‡ Effect size estimates for ankylosing spondylitis were from International Genetics of Ankylosing Spondylitis Consortium (IGAS).

# Increase in log-odds risk of Crohn's disease per additional exposure-increasing allele.

**Table S2.** Characteristics of the SNPs used in the Mendelian randomization analysis of the effects of Crohn's disease on ankylosing spondylitis

| Target SNPs | Chr | Mapped genes           | Effect allele* | Other allele* | Association with IBD† |         |                 |                     | Association with ankylosing spondylitis‡ |        |                 |
|-------------|-----|------------------------|----------------|---------------|-----------------------|---------|-----------------|---------------------|------------------------------------------|--------|-----------------|
|             |     |                        |                |               | $\beta$               | SE      | <i>p</i> -Value | <i>F</i> -Statistic | $\beta$                                  | SE     | <i>p</i> -Value |
| rs10761652  | 10  | ZNF365; LOC105378327   | A              | G             | 0.1144                | 0.0115  | 2.40E-23        | 99.1022             | 0.0047                                   | 0.0049 | 0.3329          |
| rs10878434  | 12  | LRRK2; LOC105369736    | A              | G             | 0.0762                | 0.0118  | 1.07E-10        | 41.6818             | 0.0063                                   | 0.0050 | 0.2075          |
| rs10982431  | 9   | LOC645266; TNFSF8      | A              | G             | 0.1341                | 0.015   | 6.89E-19        | 78.7960             | -0.0022                                  | 0.0063 | 0.7246          |
| rs11229555  | 11  | CNTF; GLYAT            | T              | G             | -0.0788               | 0.0114  | 5.23E-12        | 47.6005             | -0.0017                                  | 0.0047 | 0.7146          |
| rs11230563  | 11  | CD6; LOC105369326      | T              | C             | -0.0811               | 0.0106  | 1.71E-14        | 58.8447             | -0.0035                                  | 0.0044 | 0.4252          |
| rs11301008  | 3   | TRPC6                  | C              | T             | 0.0922                | 0.0168  | 4.21E-08        | 30.0495             | -0.0088                                  | 0.0070 | 0.2058          |
| rs11641184  | 16  | LITAF                  | A              | C             | 0.0773                | 0.01005 | 1.09E-14        | 59.7308             | 0.0049                                   | 0.0041 | 0.2321          |
| rs11691685  | 2   | TEX41                  | G              | A             | -0.1224               | 0.0188  | 7.27E-11        | 42.4452             | -0.0064                                  | 0.0084 | 0.4449          |
| rs1182188   | 7   | GNA12                  | C              | T             | -0.0659               | 0.0108  | 1.08E-09        | 37.1765             | -0.0075                                  | 0.0046 | 0.0991          |
| rs12184386  | 10  | CUL2                   | T              | C             | -0.0761               | 0.0102  | 8.61E-14        | 55.6608             | 0.0012                                   | 0.0043 | 0.7791          |
| rs12585310  | 13  | FGFR10P2P1; RPS21P8    | A              | G             | 0.0706                | 0.0108  | 5.25E-11        | 43.0815             | -0.0011                                  | 0.0042 | 0.7938          |
| rs1297263   | 21  | LOC101927745           | C              | A             | -0.1134               | 0.0101  | 2.10E-29        | 126.7592            | 0.0069                                   | 0.0042 | 0.1028          |
| rs13107612  | 4   | BANK1                  | T              | C             | 0.0733                | 0.0109  | 1.62E-11        | 45.3838             | 0.0006                                   | 0.0044 | 0.8909          |
| rs13154564  | 5   | LINC02202              | C              | T             | -0.2202               | 0.0400  | 3.65E-08        | 30.3280             | -0.0184                                  | 0.0164 | 0.2631          |
| rs13196377  | 6   | TRAF3IP2; TRAF3IP2-AS1 | A              | G             | 0.1664                | 0.0198  | 4.30E-17        | 70.6355             | 0.0087                                   | 0.0091 | 0.3427          |
| rs1363907   | 5   | ERAP1; ERAP2           | A              | G             | 0.0815                | 0.0104  | 4.87E-15        | 61.3138             | 0.0080                                   | 0.0042 | 0.0605          |
| rs1528602   | 16  | LINC02127; LINC02187   | C              | T             | -0.0624               | 0.0111  | 2.19E-08        | 31.3168             | 0.0052                                   | 0.0047 | 0.2682          |
| rs1535      | 11  | FADS2                  | G              | A             | 0.0619                | 0.0104  | 2.78E-09        | 35.3289             | 0.0021                                   | 0.0043 | 0.6288          |
| rs17651741  | 15  | LOC107984739           | A              | G             | 0.0702                | 0.0127  | 2.81E-08        | 30.8353             | 0.0025                                   | 0.0055 | 0.6480          |
| rs17679361  | 17  | WIPF2                  | C              | T             | 0.1917                | 0.0330  | 6.18E-09        | 33.7773             | 0.0126                                   | 0.0146 | 0.3859          |
| rs17694108  | 19  | SLC7A10; CEBPA-DT      | A              | G             | 0.0858                | 0.0111  | 1.21E-14        | 59.5200             | 0.0081                                   | 0.0045 | 0.0724          |
| rs17780256  | 17  | SLC39A11; LOC105371887 | C              | A             | -0.0834               | 0.0126  | 3.19E-11        | 44.0546             | -0.0073                                  | 0.0053 | 0.1650          |
| rs181826    | 5   | NDFIP1                 | A              | C             | 0.0820                | 0.0104  | 4.05E-15        | 61.6746             | 0.0057                                   | 0.0043 | 0.1850          |
| rs1861487   | 12  | LOC107984526           | T              | C             | 0.0599                | 0.0103  | 5.56E-09        | 33.9842             | -0.0013                                  | 0.0042 | 0.7591          |
| rs1872691   | 16  | ADCY7; BRD7            | A              | G             | -0.1104               | 0.0130  | 1.63E-17        | 72.5412             | -0.0095                                  | 0.0052 | 0.0652          |
| rs2050392   | 10  | CCND3P1; NIFKP1        | A              | G             | 0.0691                | 0.0103  | 1.87E-11        | 45.0995             | 0.0001                                   | 0.0033 | 0.9761          |
| rs2108225   | 7   | PIGCP2; SLC26A3        | A              | G             | -0.0675               | 0.0100  | 1.27E-11        | 45.8538             | -0.0029                                  | 0.0041 | 0.4791          |
| rs2143606   | 20  | OSER1; OSER1-DT        | G              | A             | -0.0566               | 0.0100  | 1.38E-08        | 32.2109             | 0.0004                                   | 0.0045 | 0.9295          |
| rs2153283   | 10  | IPMK                   | A              | C             | -0.0860               | 0.012   | 1.54E-11        | 45.4879             | -0.0026                                  | 0.0048 | 0.5863          |
| rs2274351   | 10  | SUFU; ACTR1A           | T              | C             | 0.0605                | 0.0104  | 6.93E-09        | 33.5545             | 0.0061                                   | 0.0042 | 0.1418          |
| rs2284553   | 21  | IFNGR2                 | G              | A             | 0.0595                | 0.0102  | 4.82E-09        | 34.2590             | -0.0036                                  | 0.0041 | 0.3864          |
| rs2395022   | 7   | KPNA7                  | C              | A             | -0.1816               | 0.0234  | 8.27E-15        | 60.2705             | 0.0086                                   | 0.0107 | 0.4173          |
| rs2488401   | 1   | DENND1B                | T              | C             | 0.1071                | 0.0122  | 1.43E-18        | 77.3550             | -0.0030                                  | 0.0050 | 0.5512          |
| rs2538470   | 7   | RPL32P17; LOC392145    | G              | A             | -0.0676               | 0.0102  | 3.00E-11        | 44.1771             | -0.0047                                  | 0.0044 | 0.2823          |
| rs272882    | 5   | MIR3936HG; SLC22A4     | T              | G             | 0.1661                | 0.0109  | 1.47E-52        | 232.7940            | 0.0021                                   | 0.0045 | 0.6370          |
| rs2769267   | 1   | GBAT2; RFX5; SELENBP1  | A              | G             | 0.0680                | 0.0160  | 4.10E-09        | 34.5748             | -0.0024                                  | 0.0048 | 0.6207          |
| rs2816958   | 1   | NR5A2                  | G              | A             | 0.0990                | 0.0158  | 3.64E-10        | 39.2962             | -0.0034                                  | 0.0068 | 0.6188          |

|            |    |                            |   |   |         |        |          |          |          |        |        |
|------------|----|----------------------------|---|---|---------|--------|----------|----------|----------|--------|--------|
| rs2945412  | 17 | KSR1                       | A | G | 0.0563  | 0.0101 | 2.77E-08 | 30.8624  | -0.0046  | 0.0042 | 0.2761 |
| rs34804116 | 5  | LOC105379031; LOC340090    | A | C | -0.0575 | 0.0104 | 3.62E-08 | 30.3407  | -0.0033  | 0.0043 | 0.4383 |
| rs34856868 | 1  | BTBD8                      | A | G | -0.1953 | 0.0341 | 9.80E-09 | 32.8808  | 0.0150   | 0.0127 | 0.2397 |
| rs3853824  | 17 | C17orf67                   | C | T | 0.0640  | 0.0104 | 7.70E-10 | 37.8345  | 0.0045   | 0.0044 | 0.3052 |
| rs4692386  | 4  | LOC645481; LOC105374541    | C | T | 0.0580  | 0.0102 | 1.21E-08 | 32.4676  | 0.0063   | 0.0043 | 0.1398 |
| rs4743820  | 9  | LINC00484; LOC100507103    | T | C | 0.0640  | 0.0109 | 3.80E-09 | 34.7252  | 0.0040   | 0.0044 | 0.3636 |
| rs4823077  | 22 | HORMAD2                    | G | A | 0.0796  | 0.0102 | 4.43E-15 | 61.4967  | 0.0028   | 0.0042 | 0.5062 |
| rs4845604  | 1  | RORC                       | A | G | -0.1236 | 0.0145 | 1.21E-17 | 73.1410  | 0.0096   | 0.0060 | 0.1119 |
| rs4946717  | 6  | PRDM1; RN7SKP211           | T | C | -0.0965 | 0.0100 | 4.37E-22 | 93.3541  | 0.0039   | 0.0042 | 0.3544 |
| rs4973341  | 2  | SNRPGP8; LOC100533842      | T | C | 0.0662  | 0.0104 | 2.03E-10 | 40.43920 | 0.0009   | 0.0045 | 0.8420 |
| rs55693740 | 1  | IL12RB2; LOC100130497      | A | G | 0.1373  | 0.0204 | 1.54E-11 | 45.4876  | -0.0064  | 0.0086 | 0.4560 |
| rs559928   | 11 | RPS6KA4; LINC02723         | C | T | 0.0944  | 0.0130 | 3.33E-13 | 53.0056  | 0.0062   | 0.0053 | 0.2374 |
| rs56054640 | 5  | LOC105374736; LOC105374737 | C | T | -0.1200 | 0.0191 | 3.24E-10 | 39.5252  | -0.0025  | 0.0073 | 0.7299 |
| rs56062135 | 15 | SMAD3                      | T | C | 0.1509  | 0.0198 | 2.64E-14 | 58.0829  | -0.0036  | 0.0052 | 0.4892 |
| rs56163845 | 5  | CPEB4                      | G | A | -0.0649 | 0.0111 | 4.71E-09 | 34.3040  | -0.0048  | 0.0047 | 0.3047 |
| rs6074022  | 20 | RPL13P2; CD40              | T | C | -0.0743 | 0.0114 | 8.32E-11 | 42.1807  | -0.0035  | 0.0047 | 0.4544 |
| rs61959439 | 13 | AKAP11; FABP3P2            | T | C | 0.0905  | 0.0139 | 8.15E-11 | 42.2223  | 0.0069   | 0.0059 | 0.2411 |
| rs6500315  | 16 | LINC02178; NKD1            | G | A | 0.0766  | 0.0119 | 1.12E-10 | 41.5986  | 0.0062   | 0.0052 | 0.2317 |
| rs6505402  | 17 | CCL2                       | A | G | -0.0883 | 0.0105 | 3.45E-17 | 71.0698  | -0.0053  | 0.0043 | 0.2115 |
| rs6561151  | 13 | LOC107984576               | A | G | 0.1000  | 0.0119 | 3.53E-17 | 71.0205  | 0.0070   | 0.0049 | 0.1572 |
| rs6588248  | 1  | IL23R                      | G | T | 0.0820  | 0.0099 | 1.38E-16 | 68.3274  | 0.0064   | 0.0041 | 0.1192 |
| rs6740462  | 2  | LOC105374780               | A | C | 0.0800  | 0.0116 | 5.59E-12 | 47.4679  | 0.0078   | 0.0047 | 0.0985 |
| rs67643815 | 18 | CD226                      | T | G | -0.0629 | 0.0102 | 6.42E-10 | 38.1900  | -0.0012  | 0.0041 | 0.7679 |
| rs7011507  | 8  | LOC100287157; IDI1P2       | A | G | -0.0846 | 0.0151 | 2.03E-08 | 31.4634  | -0.0052  | 0.0060 | 0.3844 |
| rs7097656  | 10 | TSPAN14                    | C | T | 0.0993  | 0.0124 | 1.27E-15 | 63.9650  | 0.0008   | 0.0056 | 0.8868 |
| rs720325   | 6  | FGFR10P, CCR6              | T | G | 0.0791  | 0.0101 | 3.82E-15 | 61.7907  | 0.0018   | 0.0041 | 0.6605 |
| rs7240004  | 18 | CTIF; LOC105372105         | G | A | -0.0665 | 0.0103 | 1.01E-10 | 41.7936  | -0.0059  | 0.0042 | 0.1605 |
| rs72978783 | 6  | LINC02539; WAKMAR2         | T | C | -0.1504 | 0.0255 | 3.68E-09 | 34.7883  | -0.0166  | 0.0105 | 0.1125 |
| rs7404095  | 16 | PRKCB                      | C | T | 0.0557  | 0.0101 | 3.10E-08 | 30.6441  | 0.0068   | 0.0042 | 0.1003 |
| rs744166   | 17 | STAT3                      | G | A | -0.1207 | 0.0172 | 2.16E-12 | 49.2469  | -0.0059  | 0.0042 | 0.1623 |
| rs7545687  | 1  | TNFRSF9                    | A | G | -0.1113 | 0.0143 | 7.20E-15 | 60.5426  | -0.0072  | 0.0056 | 0.1999 |
| rs76177630 | 10 | ZNF365                     | A | G | 0.2153  | 0.0343 | 3.62E-10 | 39.3061  | 0.0104   | 0.0122 | 0.3935 |
| rs77059113 | 2  | THADA                      | G | T | 0.1506  | 0.0189 | 1.39E-15 | 63.7826  | 0.0079   | 0.0085 | 0.3573 |
| rs7773324  | 6  | IRF4, DUSP22               | A | G | 0.0618  | 0.0106 | 5.84E-09 | 33.8880  | 0.0016   | 0.0042 | 0.7045 |
| rs7969592  | 12 | IFNG; LOC105369818         | G | A | -0.0817 | 0.0099 | 1.41E-16 | 68.2870  | -0.0045  | 0.0042 | 0.2837 |
| rs8055876  | 16 | CLEC16A                    | A | G | 0.1023  | 0.0161 | 2.02E-10 | 40.4445  | -0.0069  | 0.0064 | 0.2765 |
| rs925255   | 2  | FLJ31356; FOSL2            | T | C | -0.0759 | 0.0100 | 2.70E-14 | 57.9397  | -0.0035  | 0.0042 | 0.4074 |
| rs928722   | 6  | LOC102723649; LOC105378018 | T | C | 0.0956  | 0.0123 | 6.46E-15 | 60.7558  | -0.0010  | 0.0052 | 0.8483 |
| rs941823   | 13 | LINC00598                  | C | T | 0.0830  | 0.0115 | 6.19E-13 | 51.7867  | -0.0021  | 0.0047 | 0.6554 |
| rs9486285  | 6  | PRDM1; ATG5                | T | C | 0.0856  | 0.0135 | 2.26E-10 | 40.2288  | 0.0057   | 0.0058 | 0.3298 |
| rs9557207  | 13 | UBAC2                      | G | A | -0.0878 | 0.0121 | 3.52E-13 | 52.8966  | 1.00E-04 | 0.0051 | 0.9844 |
| rs974801   | 4  | TET2                       | G | A | -0.0728 | 0.0101 | 7.07E-13 | 51.5234  | -0.0005  | 0.0043 | 0.9074 |

SNP = single nucleotide polymorphism; Chr = chromosome; IBD = inflammatory bowel disease;  $\beta$  = regression effect size; SE = standard error (the standard error is an estimate of the standard deviation (SD) of the coefficient)

\*Allele associated with higher risk of IBD in European descent.

<sup>†</sup> Effect size estimates for ulcerative colitis were from International Inflammatory Bowel Disease Genetics Consortium (IBDGC).

<sup>‡</sup> Effect size estimates for ankylosing spondylitis were from International Genetics of Ankylosing Spondylitis Consortium (IGAS).

<sup>#</sup> Increase in log-odds risk of IBD per additional exposure-increasing allele.

**Table S3.** Characteristics of the SNPs used in the Mendelian randomization analysis of the effects of inflammatory bowel disease on ankylosing spondylitis risk.



| Exposure           | SNP        | Chr | Mapped genes               | Effect allele* | Confounding factors | p-Value | Sample size (N) |
|--------------------|------------|-----|----------------------------|----------------|---------------------|---------|-----------------|
| Ulcerative colitis | rs10010325 | 4   | TET2; TET2-AS1             | A              | osteoarthritis      | 0.0828  | 50508           |
| Ulcerative colitis | rs10121077 | 9   | INSL6; JAK2                | A              | osteoarthritis      | 0.0992  | 50508           |
| Ulcerative colitis | rs10460566 | 2   | DNMT3A                     | A              | osteoarthritis      | 0.2057  | 50508           |
| Ulcerative colitis | rs1076137  | 22  | ASCC2                      | G              | osteoarthritis      | 0.0133  | 50508           |
| Ulcerative colitis | rs1077773  | 7   | KCCAT333                   | A              | osteoarthritis      | 0.7141  | 50508           |
| Ulcerative colitis | rs10784670 | 12  | LOC107984526               | G              | osteoarthritis      | 0.3239  | 50508           |
| Ulcerative colitis | rs10799838 | 1   | RNF186; TMC04              | C              | osteoarthritis      | 0.7814  | 50508           |
| Ulcerative colitis | rs11041476 | 11  | LSP1                       | A              | osteoarthritis      | 0.1312  | 50508           |
| Ulcerative colitis | rs11083840 | 19  | PTGIR                      | G              | osteoarthritis      | 0.5356  | 50508           |
| Ulcerative colitis | rs11229555 | 11  | CNTF; GLYAT                | T              | osteoarthritis      | 0.1480  | 50508           |
| Ulcerative colitis | rs11230563 | 11  | CD6; LOC105369326          | T              | osteoarthritis      | 0.5315  | 50508           |
| Ulcerative colitis | rs11301008 | 3   | TRPC6                      | C              | osteoarthritis      | 0.1163  | 50508           |
| Ulcerative colitis | rs11641184 | 16  | LITAF                      | A              | osteoarthritis      | 0.0821  | 50508           |
| Ulcerative colitis | rs1182188  | 7   | GNA12                      | C              | osteoarthritis      | 0.4992  | 50508           |
| Ulcerative colitis | rs1297256  | 21  | LOC101927745               | T              | osteoarthritis      | 0.3751  | 50508           |
| Ulcerative colitis | rs13136827 | 4   | KIAA1109                   | C              | osteoarthritis      | 0.2935  | 50508           |
| Ulcerative colitis | rs13255292 | 8   | PVT1                       | T              | osteoarthritis      | 0.7731  | 50508           |
| Ulcerative colitis | rs13430791 | 2   | THADA                      | A              | osteoarthritis      | 0.1489  | 50508           |
| Ulcerative colitis | rs1405108  | 2   | LOC105373831; LOC100419513 | A              | osteoarthritis      | 0.2930  | 50508           |
| Ulcerative colitis | rs16939788 | 18  | LINC01882                  | T              | osteoarthritis      | 0.5278  | 50508           |
| Ulcerative colitis | rs17552904 | 7   | IKZF1; SPATA48             | T              | osteoarthritis      | 0.3302  | 50508           |
| Ulcerative colitis | rs17679361 | 17  | WIPF2                      | C              | osteoarthritis      | 0.0413  | 50508           |
| Ulcerative colitis | rs17694108 | 19  | SLC7A10; CEBPA-DT          | A              | osteoarthritis      | 0.5721  | 50508           |
| Ulcerative colitis | rs17780256 | 17  | SLC39A11; LOC105371887     | C              | osteoarthritis      | 0.0392  | 50508           |
| Ulcerative colitis | rs1886731  | 1   | HES5; TNFRSF14             | C              | osteoarthritis      | 0.5751  | 50508           |
| Ulcerative colitis | rs2070729  | 5   | IRF1                       | A              | osteoarthritis      | 0.5478  | 50508           |
| Ulcerative colitis | rs2274351  | 10  | SUFU; ACTR1A               | T              | osteoarthritis      | 0.8781  | 50508           |
| Ulcerative colitis | rs2301989  | 7   | SLC26A3                    | A              | osteoarthritis      | 0.0038  | 50508           |
| Ulcerative colitis | rs2395022  | 7   | KPNA7                      | C              | osteoarthritis      | 0.9564  | 50508           |
| Ulcerative colitis | rs2488401  | 1   | DENND1B                    | T              | osteoarthritis      | 0.4311  | 50508           |
| Ulcerative colitis | rs272882   | 5   | MIR3936HG; SLC22A4         | T              | osteoarthritis      | 0.0566  | 50508           |
| Ulcerative colitis | rs2816958  | 1   | NR5A2                      | G              | osteoarthritis      | 0.0325  | 50508           |
| Ulcerative colitis | rs28624    | 1   | ERRFI1                     | C              | osteoarthritis      | 0.8461  | 50508           |
| Ulcerative colitis | rs34659678 | 6   | TRAF3IP2; TRAF3IP2-AS1     | T              | osteoarthritis      | 0.0031  | 50508           |
| Ulcerative colitis | rs4366152  | 9   | TNFSF15                    | C              | osteoarthritis      | 0.4629  | 50508           |
| Ulcerative colitis | rs4728142  | 7   | IRF5; LOC392787            | A              | osteoarthritis      | 0.8997  | 50508           |
| Ulcerative colitis | rs4743820  | 9   | LINC00484; LOC100507103    | T              | osteoarthritis      | 0.5471  | 50508           |
| Ulcerative colitis | rs483905   | 11  | MAML2                      | A              | osteoarthritis      | 0.0425  | 50508           |
| Ulcerative colitis | rs4946717  | 6   | PRDM1; RN7SKP211           | T              | osteoarthritis      | 0.5124  | 50508           |
| Ulcerative colitis | rs4973341  | 2   | SNRPGP8; LOC100533842      | T              | osteoarthritis      | 0.7699  | 50508           |
| Ulcerative colitis | rs59418206 | 10  | CUL2                       | A              | osteoarthritis      | 0.0511  | 50508           |
| Ulcerative colitis | rs596217   | 11  | NXPE2                      | A              | osteoarthritis      | 0.9001  | 50508           |

|                    |            |    |                         |   |                |        |       |
|--------------------|------------|----|-------------------------|---|----------------|--------|-------|
| Ulcerative colitis | rs6933404  | 6  | BTF3L4P3; LOC102723649  | C | osteoarthritis | 0.9077 | 50508 |
| Ulcerative colitis | rs7240004  | 18 | CTIF; LOC105372105      | G | osteoarthritis | 0.5551 | 50508 |
| Ulcerative colitis | rs7404095  | 16 | PRKCB                   | C | osteoarthritis | 0.9334 | 50508 |
| Ulcerative colitis | rs76546301 | 7  | RNU6-1091P; FIGNL1      | A | osteoarthritis | 0.6525 | 50508 |
| Ulcerative colitis | rs7752873  | 6  | PRDM1; ATG5             | T | osteoarthritis | 0.6925 | 50508 |
| Ulcerative colitis | rs79045992 | 16 | RPL35AP33; LOC105371321 | A | osteoarthritis | 0.6770 | 50508 |
| Ulcerative colitis | rs941823   | 13 | LINC00598               | C | osteoarthritis | 0.0971 | 50508 |
| Ulcerative colitis | rs9891119  | 17 | STAT3                   | C | osteoarthritis | 0.8840 | 50508 |
| Ulcerative colitis | rs9911533  | 17 | CCR7; SMARCE1           | T | osteoarthritis | 0.5694 | 50508 |
| Ulcerative colitis | rs9941524  | 2  | LOC105373831            | G | osteoarthritis | 0.3604 | 50508 |

SNP = single nucleotide polymorphism; Chr = chromosome; \*Allele associated with higher risk of ulcerative colitis.

**Table S4.** Associations of the SNPs used in the Mendelian randomization analysis of ulcerative colitis and ankylosing spondylitis risk with potential confounding factors.

| Exposure        | SNP        | Chr | Mapped genes               | Effect allele* | Confounding factors | p-Value | Sample size (N) |
|-----------------|------------|-----|----------------------------|----------------|---------------------|---------|-----------------|
| Crohn's disease | rs102275   | 11  | TMEM258                    | C              | osteoarthritis      | 0.7428  | 50508           |
| Crohn's disease | rs10276381 | 7   | JAZF1                      | T              | osteoarthritis      | 0.5437  | 50508           |
| Crohn's disease | rs11117431 | 16  | LOC105371388; LOC105371389 | G              | osteoarthritis      | 0.4446  | 50508           |
| Crohn's disease | rs11648136 | 16  | BRD7; LINC02178            | T              | osteoarthritis      | 0.0980  | 50508           |
| Crohn's disease | rs11691685 | 2   | TEX41                      | G              | osteoarthritis      | 0.6922  | 50508           |
| Crohn's disease | rs12041056 | 1   | IL23R                      | T              | osteoarthritis      | 0.7243  | 50508           |
| Crohn's disease | rs12949918 | 17  | STAT3                      | C              | osteoarthritis      | 0.7976  | 50508           |
| Crohn's disease | rs1297258  | 21  | LOC101927745               | T              | osteoarthritis      | 0.4471  | 50508           |
| Crohn's disease | rs13204048 | 6   | SLC22A23                   | C              | osteoarthritis      | 0.5501  | 50508           |
| Crohn's disease | rs16870166 | 5   | LOC105374737               | A              | osteoarthritis      | 0.2457  | 50508           |
| Crohn's disease | rs16917597 | 10  | ZNF365                     | A              | osteoarthritis      | 0.6631  | 50508           |
| Crohn's disease | rs17293632 | 15  | SMAD3                      | T              | osteoarthritis      | 0.0858  | 50508           |
| Crohn's disease | rs17391694 | 1   | LOC107984997; RNFT1P2      | T              | osteoarthritis      | 0.0636  | 50508           |
| Crohn's disease | rs17694108 | 19  | SLC7A10; CEBPA-DT          | A              | osteoarthritis      | 0.5721  | 50508           |
| Crohn's disease | rs181826   | 5   | NDFIP1                     | A              | osteoarthritis      | 0.6094  | 50508           |
| Crohn's disease | rs1872691  | 16  | ADCY7; BRD7                | A              | osteoarthritis      | 0.5324  | 50508           |
| Crohn's disease | rs1990623  | 16  | NKD1; LINC02178            | G              | osteoarthritis      | 0.8664  | 50508           |
| Crohn's disease | rs2143606  | 20  | OSER1; OSER1-DT            | G              | osteoarthritis      | 0.1879  | 50508           |
| Crohn's disease | rs2153283  | 10  | IPMK                       | A              | osteoarthritis      | 0.1346  | 50508           |
| Crohn's disease | rs224140   | 10  | ALDH7A1P4; LOC105378327    | T              | osteoarthritis      | 0.8529  | 50508           |
| Crohn's disease | rs2284553  | 21  | IFNGR2                     | G              | osteoarthritis      | 0.2528  | 50508           |
| Crohn's disease | rs2395022  | 7   | KPNA7                      | C              | osteoarthritis      | 0.9564  | 50508           |
| Crohn's disease | rs2488401  | 1   | DENND1B                    | T              | osteoarthritis      | 0.4311  | 50508           |
| Crohn's disease | rs2538470  | 7   | RPL32P17; LOC392145        | G              | osteoarthritis      | 0.1300  | 50508           |
| Crohn's disease | rs2945412  | 17  | KSR1                       | A              | osteoarthritis      | 0.4928  | 50508           |
| Crohn's disease | rs303429   | 10  | MAP3K8; CCND3P1            | T              | osteoarthritis      | 0.8643  | 50508           |
| Crohn's disease | rs34592089 | 4   | BANK1                      | A              | osteoarthritis      | 0.9881  | 50508           |
| Crohn's disease | rs34779708 | 10  | CREM                       | G              | osteoarthritis      | 0.0506  | 50508           |
| Crohn's disease | rs34804116 | 5   | LOC105379031; LOC340090    | A              | osteoarthritis      | 0.3584  | 50508           |
| Crohn's disease | rs3812609  | 9   | NOTCH1                     | T              | osteoarthritis      | 0.8299  | 50508           |
| Crohn's disease | rs3853824  | 17  | C17orf67                   | C              | osteoarthritis      | 0.1752  | 50508           |
| Crohn's disease | rs41295117 | 10  | RPL32P23; RBM17            | C              | osteoarthritis      | 0.8794  | 50508           |
| Crohn's disease | rs4767956  | 12  | SLC2A13                    | G              | osteoarthritis      | 0.6294  | 50508           |
| Crohn's disease | rs559928   | 11  | RPS6KA4; LINC02723         | C              | osteoarthritis      | 0.5059  | 50508           |
| Crohn's disease | rs56163845 | 5   | CPEB4                      | G              | osteoarthritis      | 0.9152  | 50508           |
| Crohn's disease | rs568617   | 11  | FIBP                       | T              | osteoarthritis      | 0.4346  | 50508           |
| Crohn's disease | rs6074022  | 20  | RPL13P2; CD40              | T              | osteoarthritis      | 0.7568  | 50508           |
| Crohn's disease | rs61959448 | 13  | AKAP11; FABP3P2            | A              | osteoarthritis      | 0.0532  | 50508           |
| Crohn's disease | rs6561151  | 13  | LOC107984576               | A              | osteoarthritis      | 0.3792  | 50508           |
| Crohn's disease | rs6679677  | 1   | PHTF1                      | A              | osteoarthritis      | 0.6727  | 50508           |
| Crohn's disease | rs6738490  | 2   | ATG16L1                    | C              | osteoarthritis      | 0.2202  | 50508           |
| Crohn's disease | rs6738825  | 2   | PLCL1                      | G              | osteoarthritis      | 0.0709  | 50508           |

|                 |            |    |                                   |   |                |        |       |
|-----------------|------------|----|-----------------------------------|---|----------------|--------|-------|
| Crohn's disease | rs6740462  | 2  | LOC105374780                      | A | osteoarthritis | 0.4337 | 50508 |
| Crohn's disease | rs6827756  | 4  | KIAA1109                          | C | osteoarthritis | 0.5596 | 50508 |
| Crohn's disease | rs7097656  | 10 | TSPAN14                           | C | osteoarthritis | 0.0084 | 50508 |
| Crohn's disease | rs714027   | 22 | HORMAD2                           | G | osteoarthritis | 0.8069 | 50508 |
| Crohn's disease | rs7194886  | 16 | NOD2; SNX20                       | T | osteoarthritis | 0.0891 | 50508 |
| Crohn's disease | rs7195296  | 16 | SNN; LITAF                        | C | osteoarthritis | 0.6684 | 50508 |
| Crohn's disease | rs72727394 | 15 | RASGRP1                           | T | osteoarthritis | 0.4190 | 50508 |
| Crohn's disease | rs7438704  | 4  | SLAIN2                            | G | osteoarthritis | 0.5811 | 50508 |
| Crohn's disease | rs752508   | 19 | SBNO2; LOC102725180; LOC102723798 | A | osteoarthritis | 0.2238 | 50508 |
| Crohn's disease | rs76606004 | 9  | LOC645266; TNFSF8                 | T | osteoarthritis | 0.3726 | 50508 |
| Crohn's disease | rs7758080  | 6  | TAB2; TAB2-AS1                    | G | osteoarthritis | 0.5888 | 50508 |
| Crohn's disease | rs77981966 | 2  | THADA                             | T | osteoarthritis | 0.0420 | 50508 |
| Crohn's disease | rs7848647  | 9  | TNFSF15                           | C | osteoarthritis | 0.5158 | 50508 |
| Crohn's disease | rs925255   | 2  | FLJ31356; FOSL2                   | T | osteoarthritis | 0.3083 | 50508 |
| Crohn's disease | rs9457247  | 6  | LOC105378120; MIR3939             | T | osteoarthritis | 0.3282 | 50508 |
| Crohn's disease | rs9554587  | 13 | CCR12P; UBAC2                     | G | osteoarthritis | 0.4551 | 50508 |
| Crohn's disease | rs974801   | 4  | TET2                              | G | osteoarthritis | 0.0183 | 50508 |

SNP = single nucleotide polymorphism; Chr = chromosome; \*Allele associated with higher risk of Crohn's disease.

**Table S5.** Associations of the SNPs used in the Mendelian randomization analysis of Crohn's disease and ankylosing spondylitis risk with potential confounding factors.

| Exposure | SNP        | Chr | Mapped genes            | Effect allele* | Confounding factors | p-Value | Sample size (N) |
|----------|------------|-----|-------------------------|----------------|---------------------|---------|-----------------|
| IBD      | rs10761652 | 10  | ZNF365; LOC105378327    | A              | osteoarthritis      | 0.8483  | 50508           |
| IBD      | rs10878434 | 12  | LRRK2; LOC105369736     | A              | osteoarthritis      | 0.9382  | 50508           |
| IBD      | rs10982431 | 9   | LOC645266; TNFSF8       | A              | osteoarthritis      | 0.2174  | 50508           |
| IBD      | rs11229555 | 11  | CNTF; GLYAT             | T              | osteoarthritis      | 0.1480  | 50508           |
| IBD      | rs11230563 | 11  | CD6; LOC105369326       | T              | osteoarthritis      | 0.5315  | 50508           |
| IBD      | rs11301008 | 3   | TRPC6                   | C              | osteoarthritis      | 0.1163  | 50508           |
| IBD      | rs11641184 | 16  | LITAF                   | A              | osteoarthritis      | 0.0821  | 50508           |
| IBD      | rs11691685 | 2   | TEX41                   | G              | osteoarthritis      | 0.4309  | 50508           |
| IBD      | rs1182188  | 7   | GNA12                   | C              | osteoarthritis      | 0.6922  | 50508           |
| IBD      | rs12184386 | 10  | CUL2                    | T              | osteoarthritis      | 0.4992  | 50508           |
| IBD      | rs12585310 | 13  | FGFR10P2P1; RPS21P8     | A              | osteoarthritis      | 0.4035  | 50508           |
| IBD      | rs1297263  | 21  | LOC101927745            | C              | osteoarthritis      | 0.1319  | 50508           |
| IBD      | rs13107612 | 4   | BANK1                   | T              | osteoarthritis      | 0.2779  | 50508           |
| IBD      | rs13154564 | 5   | LINC02202               | C              | osteoarthritis      | 0.3258  | 50508           |
| IBD      | rs13196377 | 6   | TRAF3IP2; TRAF3IP2-AS1  | A              | osteoarthritis      | 0.8894  | 50508           |
| IBD      | rs1363907  | 5   | ERAP1; ERAP2            | A              | osteoarthritis      | 0.0018  | 50508           |
| IBD      | rs1528602  | 16  | LINC02127; LINC02187    | C              | osteoarthritis      | 0.5174  | 50508           |
| IBD      | rs1535     | 11  | FADS2                   | G              | osteoarthritis      | 0.3332  | 50508           |
| IBD      | rs17651741 | 15  | LOC107984739            | A              | osteoarthritis      | 0.9560  | 50508           |
| IBD      | rs17679361 | 17  | WIPF2                   | C              | osteoarthritis      | 0.3134  | 50508           |
| IBD      | rs17694108 | 19  | SLC7A10; CEBPA-DT       | A              | osteoarthritis      | 0.0413  | 50508           |
| IBD      | rs17780256 | 17  | SLC39A11; LOC105371887  | C              | osteoarthritis      | 0.5721  | 50508           |
| IBD      | rs181826   | 5   | NDFIP1                  | A              | osteoarthritis      | 0.0392  | 50508           |
| IBD      | rs1861487  | 12  | LOC107984526            | T              | osteoarthritis      | 0.6094  | 50508           |
| IBD      | rs1872691  | 16  | ADCY7; BRD7             | A              | osteoarthritis      | 0.6867  | 50508           |
| IBD      | rs2050392  | 10  | CCND3P1; NIFKP1         | A              | osteoarthritis      | 0.5324  | 50508           |
| IBD      | rs2108225  | 7   | PIGCP2; SLC26A3         | A              | osteoarthritis      | 0.7736  | 50508           |
| IBD      | rs2143606  | 20  | OSER1; OSER1-DT         | G              | osteoarthritis      | 0.0132  | 50508           |
| IBD      | rs2153283  | 10  | IPMK                    | A              | osteoarthritis      | 0.1879  | 50508           |
| IBD      | rs2274351  | 10  | SUFU; ACTR1A            | T              | osteoarthritis      | 0.1346  | 50508           |
| IBD      | rs2284553  | 21  | IFNGR2                  | G              | osteoarthritis      | 0.8781  | 50508           |
| IBD      | rs2395022  | 7   | KPNA7                   | C              | osteoarthritis      | 0.2528  | 50508           |
| IBD      | rs2488401  | 1   | DENND1B                 | T              | osteoarthritis      | 0.956   | 50508           |
| IBD      | rs2538470  | 7   | RPL32P17; LOC392145     | G              | osteoarthritis      | 0.4311  | 50508           |
| IBD      | rs272882   | 5   | MIR3936HG; SLC22A4      | T              | osteoarthritis      | 0.1300  | 50508           |
| IBD      | rs2769267  | 1   | GBAT2; RFX5; SELENBP1   | A              | osteoarthritis      | 0.0991  | 50508           |
| IBD      | rs2816958  | 1   | NR5A2                   | G              | osteoarthritis      | 0.0566  | 50508           |
| IBD      | rs2945412  | 17  | KSR1                    | A              | osteoarthritis      | 0.5224  | 50508           |
| IBD      | rs34804116 | 5   | LOC105379031; LOC340090 | A              | osteoarthritis      | 0.0325  | 50508           |
| IBD      | rs34856868 | 1   | BTBD8                   | A              | osteoarthritis      | 0.4928  | 50508           |
| IBD      | rs3853824  | 17  | C17orf67                | C              | osteoarthritis      | 0.9726  | 50508           |

|     |            |    |                            |   |                |        |       |
|-----|------------|----|----------------------------|---|----------------|--------|-------|
| IBD | rs4692386  | 4  | LOC645481; LOC105374541    | C | osteoarthritis | 0.3584 | 50508 |
| IBD | rs4743820  | 9  | LINC00484; LOC100507103    | T | osteoarthritis | 0.3266 | 50508 |
| IBD | rs4823077  | 22 | HORMAD2                    | G | osteoarthritis | 0.1752 | 50508 |
| IBD | rs4845604  | 1  | RORC                       | A | osteoarthritis | 0.5323 | 50508 |
| IBD | rs4946717  | 6  | PRDM1; RN7SKP211           | T | osteoarthritis | 0.5471 | 50508 |
| IBD | rs4973341  | 2  | SNRPGP8; LOC100533842      | T | osteoarthritis | 0.6895 | 50508 |
| IBD | rs55693740 | 1  | IL12RB2; LOC100130497      | A | osteoarthritis | 0.1694 | 50508 |
| IBD | rs559928   | 11 | RPS6KA4; LINC02723         | C | osteoarthritis | 0.5124 | 50508 |
| IBD | rs56054640 | 5  | LOC105374736; LOC105374737 | C | osteoarthritis | 0.7699 | 50508 |
| IBD | rs56062135 | 15 | SMAD3                      | T | osteoarthritis | 0.8399 | 50508 |
| IBD | rs56163845 | 5  | CPEB4                      | G | osteoarthritis | 0.5059 | 50508 |
| IBD | rs6074022  | 20 | RPL13P2; CD40              | T | osteoarthritis | 0.1812 | 50508 |
| IBD | rs61959439 | 13 | AKAP11; FABP3P2            | T | osteoarthritis | 0.0852 | 50508 |
| IBD | rs6500315  | 16 | LINC02178; NKD1            | G | osteoarthritis | 0.9152 | 50508 |
| IBD | rs6505402  | 17 | CCL2                       | A | osteoarthritis | 0.7568 | 50508 |
| IBD | rs6561151  | 13 | LOC107984576               | A | osteoarthritis | 0.0610 | 50508 |
| IBD | rs6588248  | 1  | IL23R                      | G | osteoarthritis | 0.8740 | 50508 |
| IBD | rs6740462  | 2  | LOC105374780               | A | osteoarthritis | 0.5805 | 50508 |
| IBD | rs67643815 | 18 | CD226                      | T | osteoarthritis | 0.3792 | 50508 |
| IBD | rs7011507  | 8  | LOC100287157; IDI1P2       | A | osteoarthritis | 0.8862 | 50508 |
| IBD | rs7097656  | 10 | TSPAN14                    | C | osteoarthritis | 0.4337 | 50508 |
| IBD | rs720325   | 6  | FGFR10P, CCR6              | T | osteoarthritis | 0.2222 | 50508 |
| IBD | rs7240004  | 18 | CTIF; LOC105372105         | G | osteoarthritis | 0.0952 | 50508 |
| IBD | rs72978783 | 6  | LINC02539; WAKMAR2         | T | osteoarthritis | 0.0084 | 50508 |
| IBD | rs7404095  | 16 | PRKCB                      | C | osteoarthritis | 0.7817 | 50508 |
| IBD | rs744166   | 17 | STAT3                      | G | osteoarthritis | 0.5551 | 50508 |
| IBD | rs7545687  | 1  | TNFRSF9                    | A | osteoarthritis | 0.0543 | 50508 |
| IBD | rs76177630 | 10 | ZNF365                     | A | osteoarthritis | 0.9334 | 50508 |
| IBD | rs77059113 | 2  | THADA                      | G | osteoarthritis | 0.7988 | 50508 |
| IBD | rs7773324  | 6  | IRF4, DUSP22               | A | osteoarthritis | 0.9301 | 50508 |
| IBD | rs7969592  | 12 | IFNG; LOC105369818         | G | osteoarthritis | 0.4686 | 50508 |
| IBD | rs8055876  | 16 | CLEC16A                    | A | osteoarthritis | 0.0672 | 50508 |
| IBD | rs925255   | 2  | FLJ31356; FOSL2            | T | osteoarthritis | 0.0780 | 50508 |
| IBD | rs928722   | 6  | LOC102723649; LOC105378018 | T | osteoarthritis | 0.9491 | 50508 |
| IBD | rs941823   | 13 | LINC00598                  | C | osteoarthritis | 0.1129 | 50508 |
| IBD | rs9486285  | 6  | PRDM1; ATG5                | T | osteoarthritis | 0.3083 | 50508 |
| IBD | rs9557207  | 13 | UBAC2                      | G | osteoarthritis | 0.9440 | 50508 |
| IBD | rs974801   | 4  | TET2                       | G | osteoarthritis | 0.0971 | 50508 |

SNP = single nucleotide polymorphism; Chr = chromosome; IBD = inflammatory bowel disease; \*Allele associated with higher risk of inflammatory bowel disease.

**Table S6.** Associations of the SNPs used in the Mendelian randomization analysis of inflammatory bowel disease and ankylosing spondylitis risk with potential confounding factors.

| Target SNPs | Chr | Mapped genes          | Effect allele* | Other allele* | Association with ankylosing spondylitis <sup>†</sup> |        |                 |                     | Association with ulcerative colitis <sup>‡</sup> |        |                 |
|-------------|-----|-----------------------|----------------|---------------|------------------------------------------------------|--------|-----------------|---------------------|--------------------------------------------------|--------|-----------------|
|             |     |                       |                |               | $\beta$                                              | SE     | <i>p</i> -Value | <i>F</i> -Statistic | $\beta$                                          | SE     | <i>p</i> -Value |
| rs11065898  | 12  | SH2B3                 | T              | C             | 0.0263                                               | 0.0048 | 4.71E-08        | 30.0213             | -0.0172                                          | 0.0151 | 0.2552          |
| rs17336532  | 6   | ZBED9                 | T              | C             | -0.0801                                              | 0.0053 | 1.47E-52        | 228.4090            | -0.0293                                          | 0.0158 | 0.0639          |
| rs1860545   | 12  | TNFRSF1A              | A              | G             | -0.0275                                              | 0.0044 | 2.78E-10        | 39.0625             | -0.0223                                          | 0.0131 | 0.0869          |
| rs2074475   | 6   | TRIM15                | C              | T             | 0.1858                                               | 0.0117 | 1.09E-56        | 252.1853            | -0.0525                                          | 0.0500 | 0.2938          |
| rs4129267   | 1   | IL6R                  | T              | C             | -0.0308                                              | 0.0042 | 3.32E-13        | 53.7778             | -0.0251                                          | 0.0131 | 0.0555          |
| rs6600247   | 1   | RUNX3; LOC105376878   | C              | T             | 0.0328                                               | 0.0042 | 2.58E-15        | 60.98873            | -0.0001                                          | 0.0131 | 0.9920          |
| rs7771335   | 6   | MAS1LP1; LOC105375008 | G              | A             | -0.1198                                              | 0.0113 | 4.27E-26        | 112.3975            | 0.0392                                           | 0.0391 | 0.3169          |
| rs9393646   | 6   | CARMIL1               | A              | G             | 0.0462                                               | 0.0056 | 1.10E-16        | 68.0625             | 0.0273                                           | 0.0171 | 0.1089          |

SNP = single nucleotide polymorphism; Chr = chromosome;  $\beta$  = regression effect size; SE= standard error (the standard error is an estimate of the standard deviation (SD) of the coefficient)

\*Allele associated with higher risk of ulcerative colitis in European descent.

<sup>†</sup>Effect size estimates for ankylosing spondylitis were from International Genetics of Ankylosing Spondylitis Consortium (IGAS).

<sup>‡</sup>Effect size estimates for ulcerative disease were from International Inflammatory Bowel Disease Genetics Consortium (IIBDGC).

<sup>#</sup>Increase in log-odds risk of IBD per additional exposure-increasing allele.

**Table S7.** Characteristics of the SNPs used in the Mendelian randomization analysis of the effects of ankylosing spondylitis on ulcerative colitis risk.

| Target SNPs | Chr | Mapped genes        | Effect allele* | Other allele* | Association with ankylosing spondylitis <sup>†</sup> |        |                 |                     | Association with Crohn's disease <sup>‡</sup> |         |                 |
|-------------|-----|---------------------|----------------|---------------|------------------------------------------------------|--------|-----------------|---------------------|-----------------------------------------------|---------|-----------------|
|             |     |                     |                |               | $\beta$                                              | SE     | <i>p</i> -Value | <i>F</i> -Statistic | $\beta$                                       | SE      | <i>p</i> -Value |
| rs11065898  | 12  | SH2B3               | T              | C             | 0.0263                                               | 0.0048 | 4.71E-08        | 30.0213             | -0.0232                                       | 0.01460 | 0.1126          |
| rs12615545  | 2   | LINC01934           | C              | T             | 0.0255                                               | 0.0042 | 1.03E-09        | 36.8622             | -0.0275                                       | 0.0126  | 0.0287          |
| rs130067    | 6   | CCHCR1              | G              | T             | 0.1286                                               | 0.0047 | 8.61E-166       | 748.6627            | -0.0184                                       | 0.0152  | 0.2275          |
| rs27529     | 5   | ERAP1               | G              | A             | -0.0620                                              | 0.0043 | 3.28E-47        | 207.8962            | 1.16E-05                                      | 0.0134  | 0.9993          |
| rs2927613   | 5   | ERAP1               | A              | G             | -0.0273                                              | 0.0044 | 7.07E-10        | 38.4964             | -0.0165                                       | 0.0128  | 0.1964          |
| rs6600247   | 1   | RUNX3; LOC105376878 | C              | T             | 0.0328                                               | 0.0042 | 2.58E-15        | 60.9887             | -0.0253                                       | 0.0127  | 0.0460          |
| rs9393646   | 6   | CARMIL1             | A              | G             | 0.0462                                               | 0.0056 | 1.10E-16        | 68.0625             | -0.0087                                       | 0.0165  | 0.5995          |
| rs9901869   | 17  | MRPL45P2; NPEPPS    | A              | G             | 0.0319                                               | 0.0041 | 6.04E-15        | 60.5360             | -0.0145                                       | 0.0128  | 0.2554          |

SNP = single nucleotide polymorphism; Chr = chromosome;  $\beta$  = regression effect size; SE= standard error (the standard error is an estimate of the standard deviation (SD) of the coefficient)

\*Allele associated with higher risk of Crohn's disease in European descent.

<sup>†</sup> Effect size estimates for ankylosing spondylitis were from International Genetics of Ankylosing Spondylitis Consortium (IGAS).

<sup>‡</sup> Effect size estimates for Crohn's disease were from International Inflammatory Bowel Disease Genetics Consortium (IIBDGC).

<sup>#</sup> Increase in log-odds risk of IBD per additional exposure-increasing allele.

**Table S8.** Characteristics of the SNPs used in the Mendelian randomization analysis of the effects of ankylosing spondylitis on Crohn's disease risk.



| Target SNPs | Chr | Mapped genes        | Effect allele* | Other allele* | Association with ankylosing spondylitis <sup>†</sup> |        |                 |                     | Association with IBD <sup>‡</sup> |        |                 |
|-------------|-----|---------------------|----------------|---------------|------------------------------------------------------|--------|-----------------|---------------------|-----------------------------------|--------|-----------------|
|             |     |                     |                |               | $\beta$                                              | SE     | <i>p</i> -Value | <i>F</i> -Statistic | $\beta$                           | SE     | <i>p</i> -Value |
| rs11065898  | 12  | SH2B3               | T              | C             | 0.0263                                               | 0.0048 | 4.71E-08        | 30.0213             | -0.0189                           | 0.0120 | 0.1163          |
| rs2074475   | 6   | TRIM15              | C              | T             | 0.1858                                               | 0.0117 | 1.09E-56        | 252.1853            | -0.0723                           | 0.0396 | 0.0682          |
| rs2272593   | 6   | PRRC2A; MIR6832     | C              | T             | 0.1191                                               | 0.0052 | 1.72E-117       | 524.5862            | 0.0081                            | 0.0116 | 0.4830          |
| rs2596501   | 6   | HLA-B               | T              | C             | -0.1523                                              | 0.0042 | 1.00E-200       | 1314.9257           | 0.0141                            | 0.0102 | 0.1672          |
| rs6600247   | 1   | RUNX3; LOC105376878 | C              | T             | 0.0328                                               | 0.0042 | 2.58E-15        | 60.9887             | -0.0163                           | 0.0105 | 0.1188          |
| rs9393646   | 6   | CARMIL1             | A              | G             | 0.0462                                               | 0.0056 | 1.10E-16        | 68.0625             | 0.0122                            | 0.0136 | 0.3691          |

SNP = single nucleotide polymorphism; Chr = chromosome; IBD = inflammatory bowel disease;  $\beta$  = regression effect size; SE= standard error (the standard error is an estimate of the standard deviation (SD) of the coefficient)

\*Allele associated with higher risk of IBD in European descent.

<sup>†</sup>Effect size estimates for ankylosing spondylitis were from International Genetics of Ankylosing Spondylitis Consortium (IGAS).

<sup>‡</sup>Effect size estimates for ulcerative disease were from International Inflammatory Bowel Disease Genetics Consortium (IIBDGC).

#Increase in log-odds risk of IBD per additional exposure-increasing allele.

**Table S9.** Characteristics of the SNPs used in the Mendelian randomization analysis of the effects of ankylosing spondylitis on IBD risk.

| Exposure traits        | MR methods                    | Ulcerative colitis |                        |        |                    | Crohn's disease |                        |        |                    | IBD            |                        |        |                    |
|------------------------|-------------------------------|--------------------|------------------------|--------|--------------------|-----------------|------------------------|--------|--------------------|----------------|------------------------|--------|--------------------|
|                        |                               | Number of SNPs     | OR (95% CI)            | SE     | MR <i>p</i> -value | Number of SNPs  | OR (95% CI)            | SE     | MR <i>p</i> -value | Number of SNPs | OR (95% CI)            | SE     | MR <i>p</i> -value |
| Ankylosing spondylitis | MR-Egger                      | 8                  | 0.8900 (0.4993–1.5866) | 0.2949 | 0.7065             | 8               | 0.9961 (0.6770–1.4655) | 0.1970 | 0.9847             | 6              | 1.0009 (0.7661–1.3078) | 0.1364 | 0.9948             |
|                        | Inverse variance weighted     | 8                  | 1.1858 (0.8639–1.6278) | 0.1616 | 0.2916             | 8               | 0.8244 (0.6599–1.0299) | 0.1136 | 0.0890             | 6              | 0.9304 (0.8098–1.0689) | 0.0708 | 0.3083             |
|                        | Weighted median               | 8                  | 1.1973 (0.8618–1.6633) | 0.1677 | 0.2831             | 8               | 0.8662 (0.7050–1.0643) | 0.1051 | 0.1715             | 6              | 0.9488 (0.8430–1.0679) | 0.0603 | 0.3839             |
|                        | Robust adjusted profile score | 8                  | 1.0563 (0.7722–1.4449) | 0.1598 | 0.7320             | 8               | 0.8269 (0.6549–1.0442) | 0.1190 | 0.1103             | 6              | 0.9220 (0.7994–1.0635) | 0.0728 | 0.2651             |
|                        | MR-PRESSO test                | 8                  | 1.1858 (0.8639–1.6278) | 0.1616 | 0.3266             | 8               | 0.8244 (0.6599–1.0299) | 0.1136 | 0.1328             | 6              | 0.9304 (0.8098–1.0689) | 0.0708 | 0.3550             |

MR = Mendelian randomization; PRESSO = Pleiotropy RESidual Sum and Outlier; SNP = single nucleotide polymorphism; IBD = inflammatory bowel disease;

OR = odds ratio; CI = confidence interval; SE = standard error (the standard error is an estimate of the standard deviation (SD) of the coefficient)

**Table S10.** MR estimates from each method of assessing the causal effects of ankylosing spondylitis on ulcerative disease, Crohn's disease and IBD risk.

| Exposure traits        | MR methods                | Ulcerative colitis         |                       |                               |                                       | Crohn's disease            |                       |                               |                                       | IBD                        |                       |                               |                                       |
|------------------------|---------------------------|----------------------------|-----------------------|-------------------------------|---------------------------------------|----------------------------|-----------------------|-------------------------------|---------------------------------------|----------------------------|-----------------------|-------------------------------|---------------------------------------|
|                        |                           | Cochran <i>Q</i> statistic | <i>I</i> <sup>2</sup> | Heterogeneity <i>p</i> -value | MR-Egger<br>Intercept <i>p</i> -value | Cochran <i>Q</i> statistic | <i>I</i> <sup>2</sup> | Heterogeneity <i>p</i> -value | MR-Egger<br>Intercept <i>p</i> -value | Cochran <i>Q</i> statistic | <i>I</i> <sup>2</sup> | Heterogeneity <i>p</i> -value | MR-Egger<br>Intercept <i>p</i> -value |
| Ankylosing spondylitis | MR-Egger                  | 11.3042                    | 0.3808                | 0.0794                        | 0.2931                                | 9.2307                     | 0.3500                | 0.1610                        | 0.2895                                | 8.5803                     | 0.5338                | 0.0725                        | 0.5554                                |
|                        | Inverse variance weighted | 13.8050                    | 0.4205                | 0.0548                        |                                       | 11.3069                    | 0.3809                | 0.1258                        |                                       | 9.4664                     | 0.4718                | 0.0918                        |                                       |
|                        | Maximum likelihood        | 13.7678                    | 0.4189                | 0.0555                        |                                       | 11.2604                    | 0.3784                | 0.1277                        |                                       | 9.4589                     | 0.4714                | 0.0921                        |                                       |

MR = Mendelian randomization; IBD = inflammatory bowel disease

**Table S11.** Heterogeneity and pleiotropy analysis of ankylosing spondylitis with ulcerative disease, Crohn's disease, and IBD risk using different analytic methods.

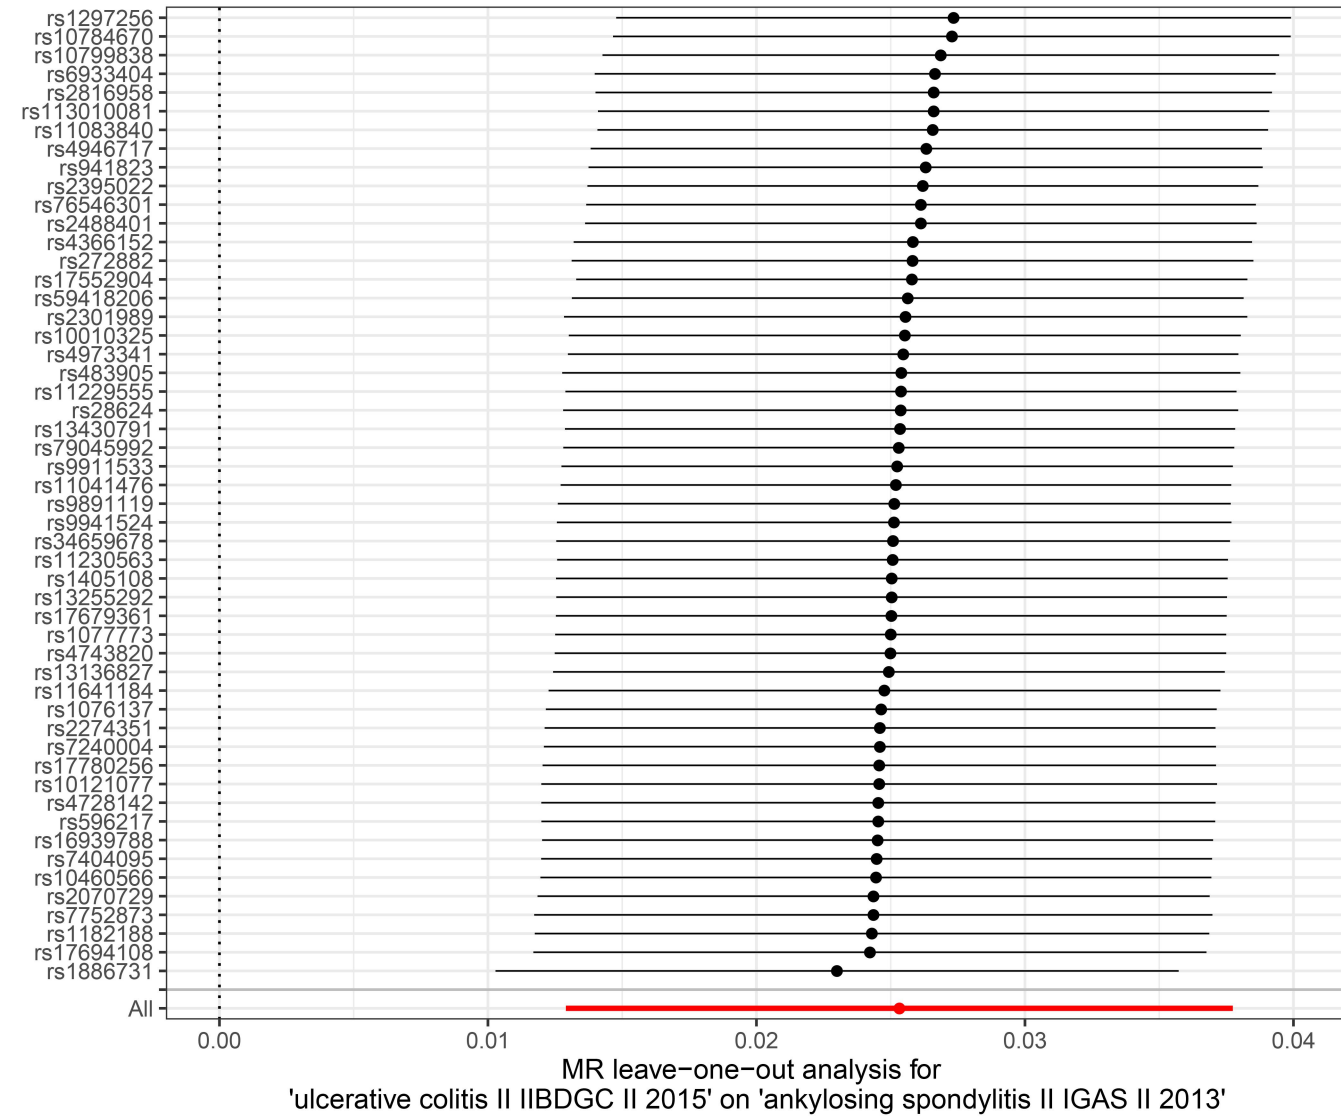

**Figure S1.** “Leave-one-out” sensitivity analysis of causal effects of ulcerative colitis on ankylosing spondylitis. The significance of the red line is the MR results of the inverse variance weighting (IVW) method.

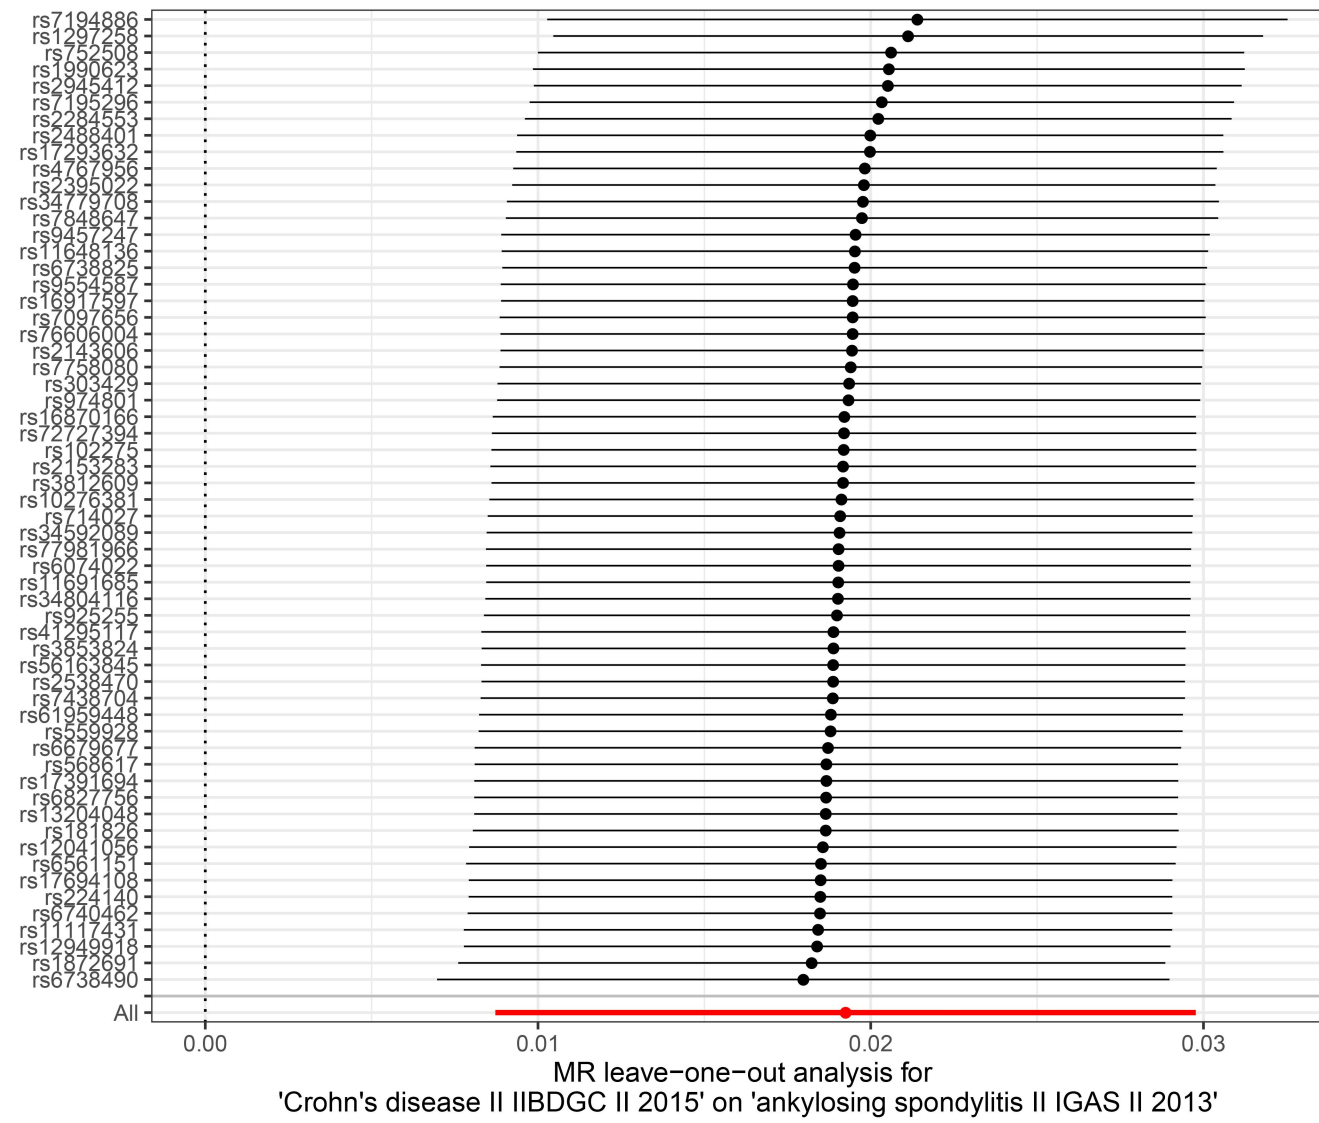

**Figure S2.** “Leave-one-out” sensitivity analysis of causal effects of Crohn’s disease on ankylosing spondylitis. The significance of the red line is the MR results of the inverse variance weighting (IVW) method.

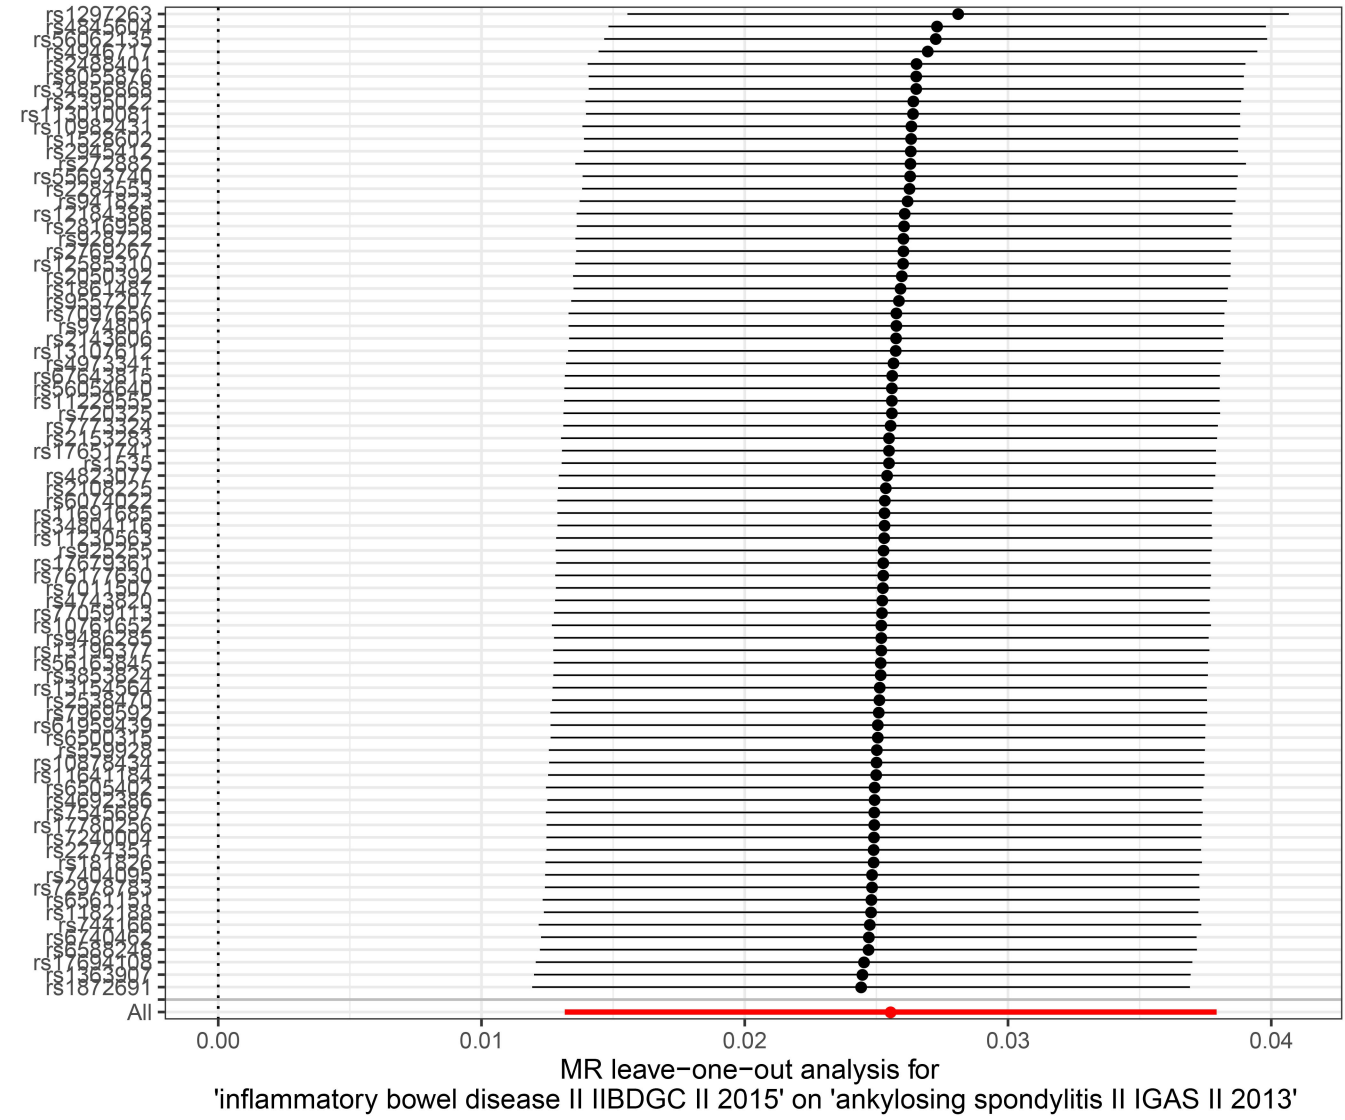

**Figure S3.** “Leave-one-out” sensitivity analysis of causal effects of inflammatory bowel disease on ankylosing spondylitis. The significance of the red line is the MR results of the inverse variance weighting (IVW) method.

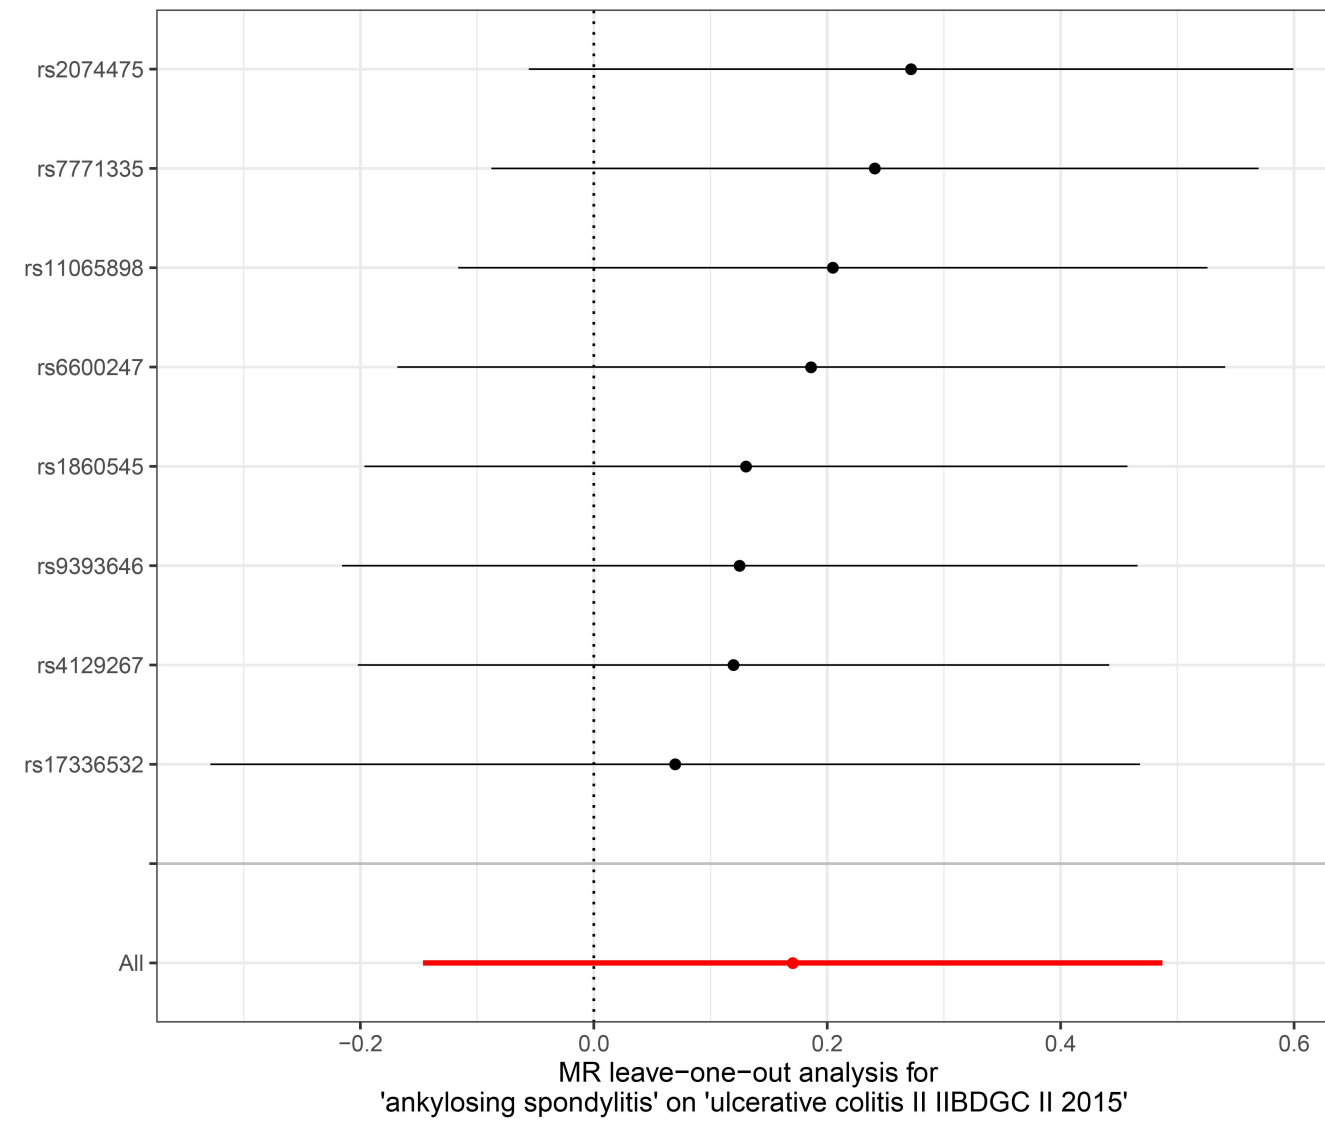

**Figure S4.** “Leave-one-out” sensitivity analysis of causal effects of ankylosing spondylitis on ulcerative colitis. The significance of the red line is the MR results of the inverse variance weighting (IVW) method.

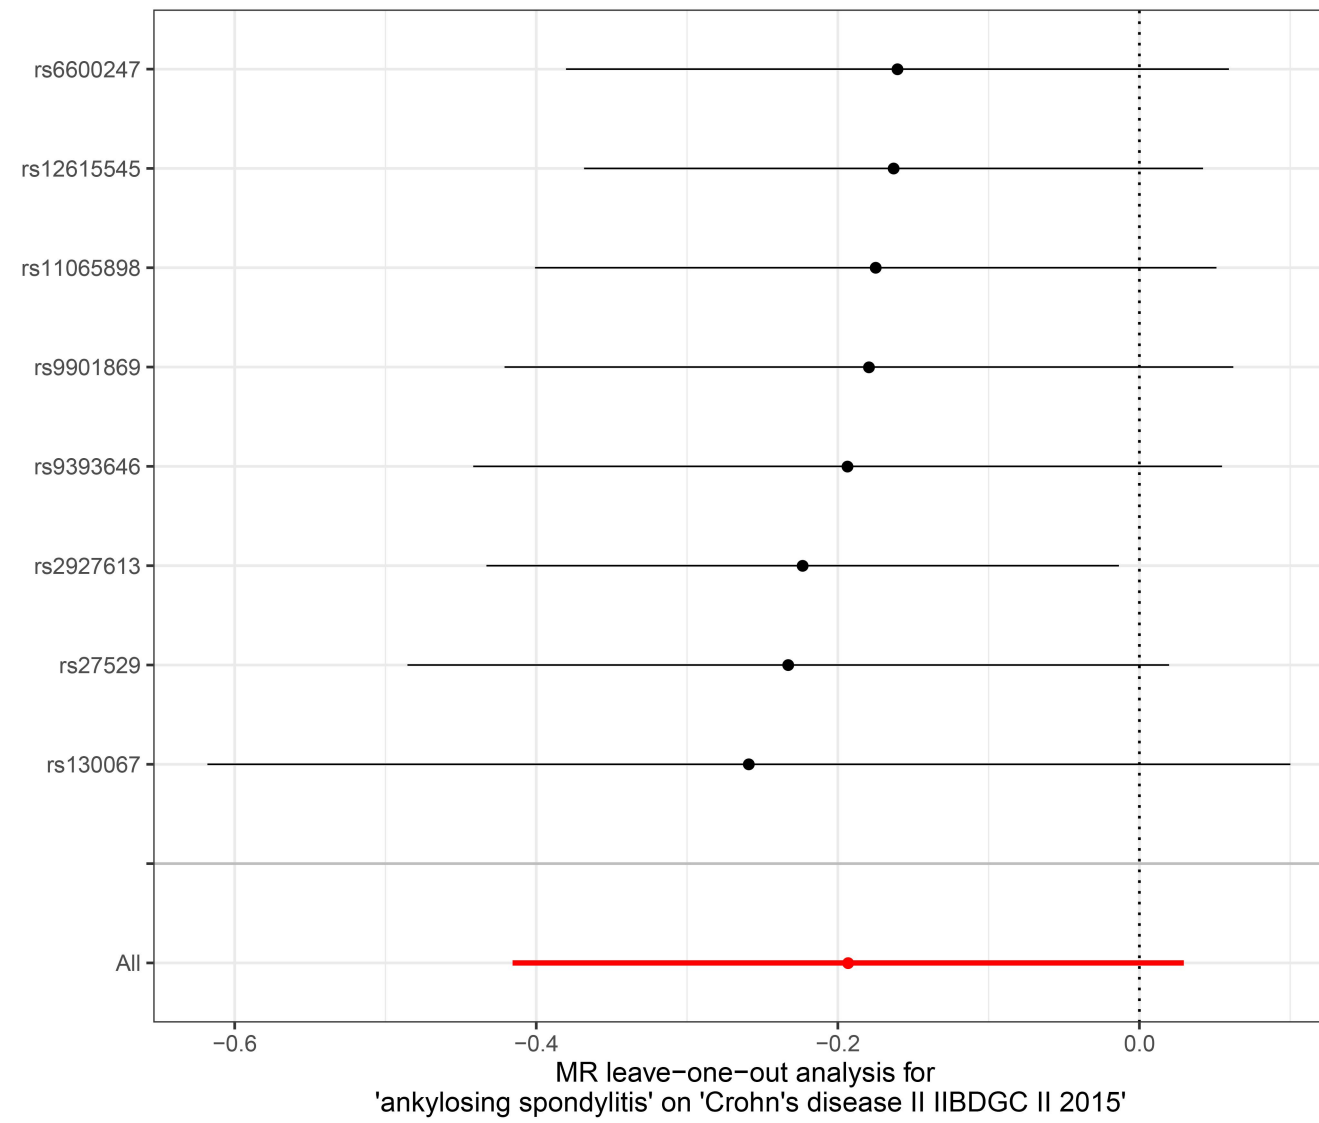

**Figure S5.** “Leave-one-out” sensitivity analysis of causal effects of ankylosing spondylitis on Crohn’s disease. The significance of the red line is the MR results of the inverse variance weighting (IVW) method. Note: The p-value after removing rs2927613 in the MR leave-one-out analysis is 0.0369, which is not statistically significant at a Bonferroni-corrected  $p < 0.0167$  (e.g.,  $0.05/3$  outcomes).



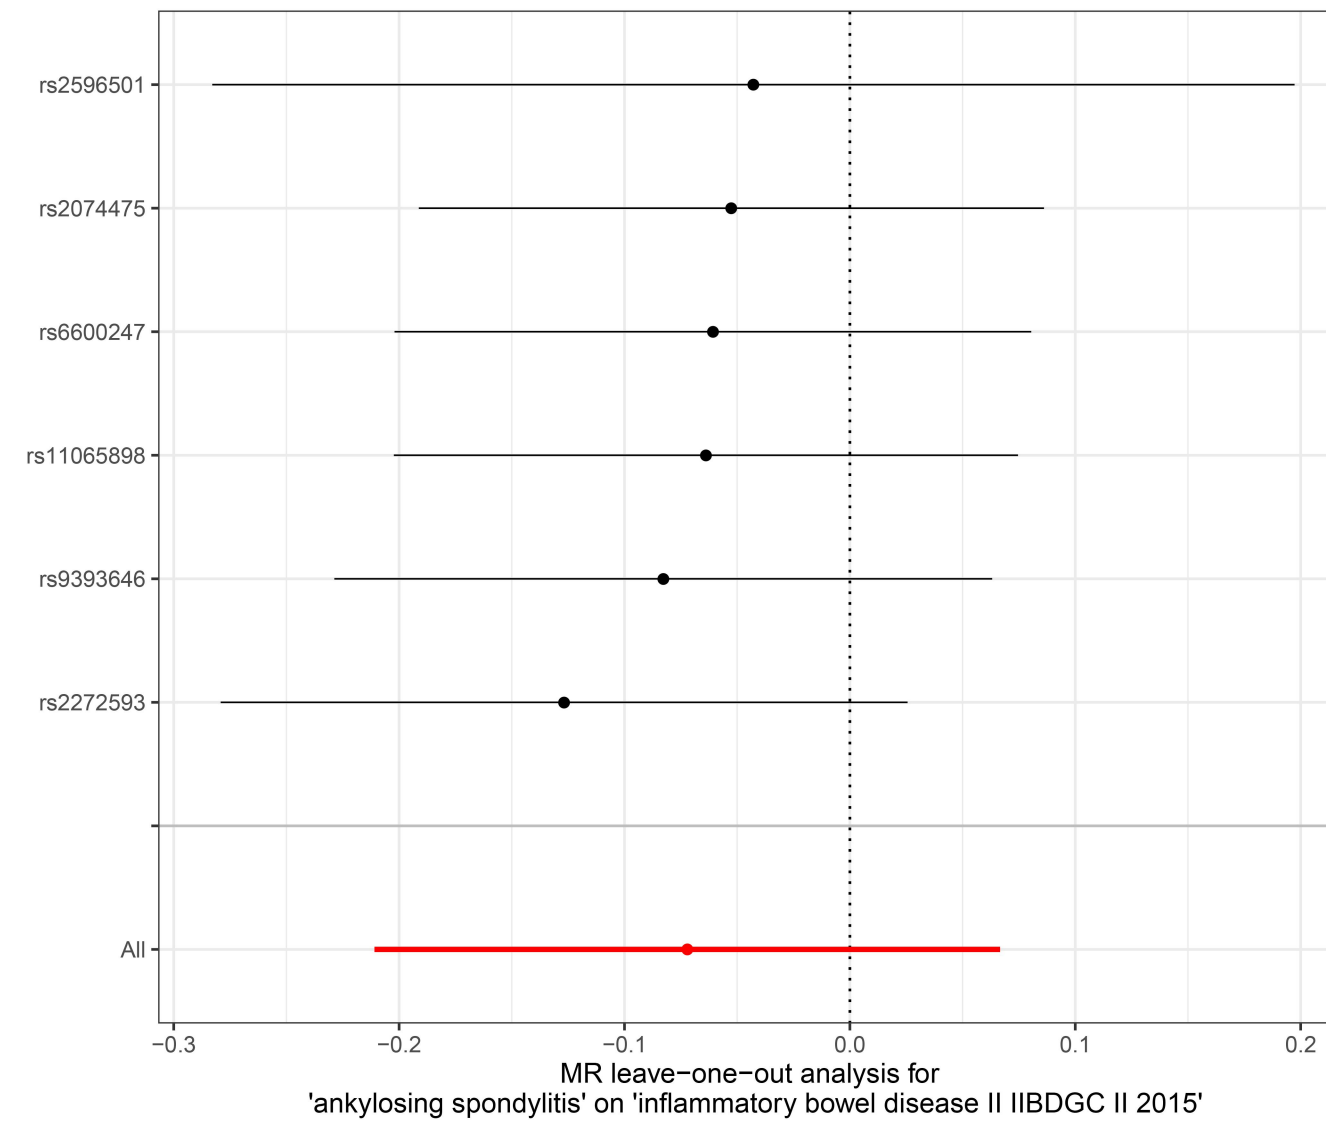

**Figure S6.** “Leave-one-out” sensitivity analysis of causal effects of ankylosing spondylitis on inflammatory bowel disease. The significance of the red line is the MR results of the inverse variance weighting (IVW) method.
